# Supplementary material for: HOTf-catalyzed intermolecular hydroamination reactions of alkenes and alkynes with anilines
Source: Royal Society of Chemistry journal article supplement (doi:10.1039/c5ra05209b), 2015-01-01

## Supporting Information for

# HOTf-Catalyzed Intermolecular Hydroamination of Alkenes and Alkynes with Anilines

Xuefeng Xu, Xu Zhang,\* Zhiqiang Wang\*, and Manman Kong

School of Chemistry and Pharmacy Engineering, Nanyang Normal University,  
Nanyang 473061, China

*\*Corresponding Author. E-mail: zhangxuedu@126.com.*

### General Methods:

$^1\text{H}$  and  $^{13}\text{C}$  NMR spectra were recorded in  $\text{CDCl}_3$  solutions on a Bruker AVANCE 400 MHz or 500 MHz spectrometer. High resolution mass spectra were obtained on a waters Micromass G C T machine. All the other reagents and solvents were used as from commercial sources. Unless noted below, all the other compounds have been reported in the literature or are commercially available.

### General catalytic procedure:

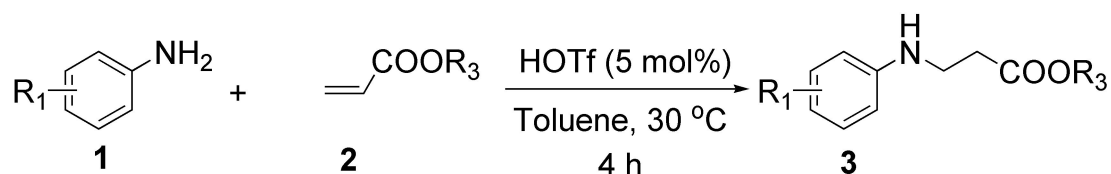

Aniline (0.093g, 1 mmol) was added to the round bottom flask, charged with HOTf (0.05 mmol) and 1.0 mmol alkene. The mixture was stirred at 30 °C for 4 hours, then cooled down to room temperature, diluted with 10 ml dichloromethane and washed with 10 ml H<sub>2</sub>O. The aqueous layer was extracted twice with dichloromethane (10 ml) and the combined organic phase was dried over anhydrous Na<sub>2</sub>SO<sub>4</sub>. After evaporation of the solvents, the residue was purified by silica gel chromatography (dichloromethane/pet. ether).

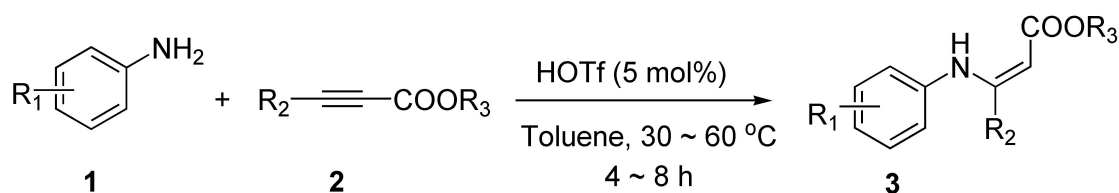

Aniline (0.093g, 1 mmol) was added to the round bottom flask, charged with HOTf (0.05 mmol) and 2.0 mmol alkene. The mixture was stirred at 30~60 °C for 4 hours, then cooled down to room temperature, diluted with 10 ml dichloromethane and washed with 10 ml H<sub>2</sub>O. The aqueous layer was extracted twice with dichloromethane (10 ml) and the combined organic phase was dried over anhydrous Na<sub>2</sub>SO<sub>4</sub>. After evaporation of the solvents, the residue was purified by silica gel chromatography (dichloromethane/pet. ether).

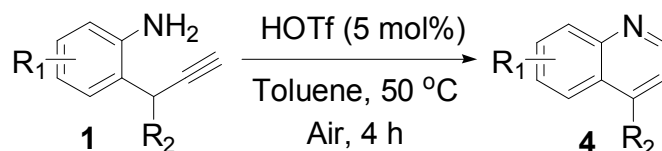

A test tube (25 mL) was charged with substrate **1** (1 mmol), HOTf (0.05 mmol) and 2.0 ml toluene. The mixture was stirred at 50 °C for 4 hours, then the reaction was cooled down to room temperature, the mixture was quenched by sat. aq. NaHCO<sub>3</sub>,

and diluted with 10 ml dichloromethane and washed with 10 ml H<sub>2</sub>O. The aqueous layer was extracted twice with dichloromethane (10 ml) and the combined organic phase was dried over Na<sub>2</sub>SO<sub>4</sub>. After evaporation of the solvents, the residue was purified by silica gel chromatography (hexane/AcOEt = 20:1).

## Characterization data for products

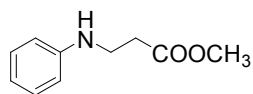

<sup>1</sup>H NMR (400 MHz, CDCl<sub>3</sub>) δ ppm: 7.16 - 7.20 (m, 2H), 6.70 - 6.74 (m, 1H), 6.61 - 6.63 (t, 2H), 4.01 (s, 1H), 3.70 (s, 3H), 3.44 - 3.47 (t, 2H), 2.61 - 2.64 (t, 2H); <sup>13</sup>C NMR (100 MHz, CDCl<sub>3</sub>) δ ppm: 172.9, 147.8, 129.3, 117.8, 113.1, 51.8, 39.4, 33.7; HRMS (EI) Calcd. for C<sub>10</sub>H<sub>13</sub>NO<sub>2</sub>: [M<sup>+</sup>], 179.0946. Found: m/z 179.0942.

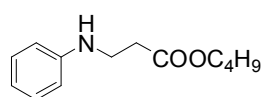

<sup>1</sup>H NMR (400 MHz, CDCl<sub>3</sub>) δ ppm: 7.16 - 7.20 (m, 2H), 6.70 - 6.73 (m, 1H), 6.61 - 6.63 (t, 2H), 4.08 - 4.11 (t, 2H), 4.02 (s, 1H), 3.42 - 3.46 (t, 2H), 2.59 - 2.62 (t, 2H), 1.57 - 1.63 (m, 2H), 1.34 - 1.40 (m, 2H), 0.91 - 0.95 (t, 3H); <sup>13</sup>C NMR (100 MHz, CDCl<sub>3</sub>) δ ppm: 172.5, 147.6, 129.3, 117.7, 113.1, 64.5, 39.5, 34.0, 30.6, 19.2, 13.7; HRMS (EI) Calcd. for C<sub>13</sub>H<sub>19</sub>NO<sub>2</sub>: [M<sup>+</sup>], 221.1416. Found: m/z 221.1417.

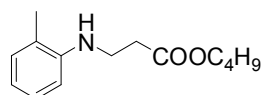

<sup>1</sup>H NMR (400 MHz, CDCl<sub>3</sub>) δ ppm: 7.10 - 7.23 (m, 1H), 7.04 - 7.06 (m, 1H), 6.61 - 6.68 (m, 2H), 4.08 - 4.12 (t, 2H), 3.96 (s, 1H), 3.47 - 3.50 (t, 2H), 2.63 - 2.66 (t, 2H), 2.12 (s, 3H), 1.59 - 1.63 (m, 2H), 1.34 - 1.40 (m, 2H), 0.91 - 0.94 (t, 3H); <sup>13</sup>C NMR (100 MHz, CDCl<sub>3</sub>) δ ppm: 172.6, 145.6, 130.3, 127.1, 122.5, 117.3, 109.7, 64.6, 39.5, 34.0, 30.7, 19.2, 17.4, 13.7; HRMS (EI) Calcd. for C<sub>14</sub>H<sub>21</sub>NO<sub>2</sub>: [M<sup>+</sup>], 235.1572. Found: m/z 235.11577.

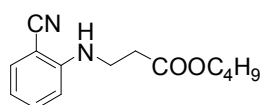

<sup>1</sup>H NMR (400 MHz, CDCl<sub>3</sub>) δ ppm: 7.38 - 7.41 (m, 2H), 6.67 - 6.71 (m, 2H), 4.89 (s,

1H), 4.11 - 4.15 (t, 2H), 3.53 - 3.56 (t, 2H), 2.64 - 2.67 (t, 2H), 1.61 - 1.65 (m, 2H), 1.35 - 1.38 (m, 2H), 0.91 - 0.95 (t, 3H); <sup>13</sup>C NMR (100 MHz, CDCl<sub>3</sub>) δ ppm: 171.7, 150.0, 134.3, 123.0, 117.7, 116.9, 110.5, 96.3, 64.9, 38.9, 33.9, 30.6, 19.1, 13.7; HRMS (EI) Calcd. For C<sub>14</sub>H<sub>18</sub>N<sub>2</sub>O<sub>2</sub>: [M<sup>+</sup>], 246.1468. Found: m/z 246.1467.

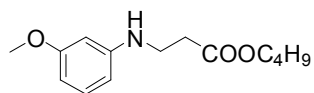

<sup>1</sup>H NMR (400 MHz, CDCl<sub>3</sub>) δ ppm: 7.05 - 7.09 (m, 1H), 6.26 - 6.29 (m, 1H), 6.17 - 6.24 (m, 1H), 6.16 (s, 1H), 4.07 - 4.10 (t, 2H), 3.75 (s, 3H), 3.40 - 3.43 (t, 2H), 2.58 - 2.61 (t, 2H), 1.58 - 1.62 (m, 2H), 1.36 - 1.39 (m, 2H), 0.91 - 0.94 (t, 3H); <sup>13</sup>C NMR (100 MHz, CDCl<sub>3</sub>) δ ppm: 172.5, 147.6, 129.3, 113.1, 117.7, 117.3, 109.7, 64.5, 39.5, 34.0, 30.6, 19.2, 13.7; HRMS (EI) Calcd. for C<sub>14</sub>H<sub>21</sub>NO<sub>3</sub>: [M<sup>+</sup>], 251.1521. Found: m/z 251.1527.

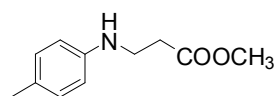

<sup>1</sup>H NMR (400 MHz, CDCl<sub>3</sub>) δ ppm: 7.00 (d, j = 8Hz, 2H), 6.55 (d, j = 8Hz, 2H), 3.69 (s, 3H), 3.41 - 3.44 (t, 2H), 2.59 - 2.62 (t, 2H), 2.23 (s, 3H); <sup>13</sup>C NMR (100 MHz, CDCl<sub>3</sub>) δ ppm: 172.9, 145.3, 129.8, 127.1, 113.3, 51.7, 39.8, 33.8, 20.4; HRMS (EI) Calcd. for C<sub>11</sub>H<sub>15</sub>NO<sub>2</sub>: [M<sup>+</sup>], 193.1101. Found: m/z 193.1102.

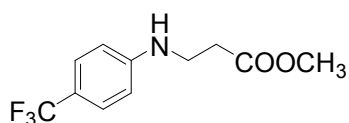

<sup>1</sup>H NMR (400 MHz, CDCl<sub>3</sub>) δ ppm: 7.39 (d, j = 8Hz, 2H), 6.59 (d, j = 8Hz, 2H), 4.38 (s, 1H), 3.69 (s, 3H), 3.45 - 3.48 (t, 2H), 2.60 - 2.63 (t, 2H); <sup>13</sup>C NMR (100 MHz, CDCl<sub>3</sub>) δ ppm: 172.6, 150.2, 126.7, 126.6, 120.0, 51.8, 38.8, 33.4; HRMS (EI) Calcd. for C<sub>11</sub>H<sub>12</sub>F<sub>3</sub>NO<sub>2</sub>: [M<sup>+</sup>], 247.0820. Found: m/z 247.0822.

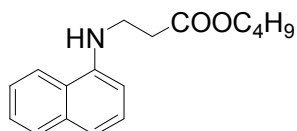

$^1\text{H}$  NMR (400 MHz,  $\text{CDCl}_3$ )  $\delta$  ppm: 7.59 - 7.67 (m, 3H), 7.32 - 7.59 (m, 1H), 7.17 - 7.20 (m, 1H), 6.80 - 6.85 (m, 2H), 4.08 - 4.11 (t, 2H), 3.50 - 3.53 (t, 2H), 2.63 - 2.66 (t, 2H), 1.57 - 1.61 (m, 2H), 1.32 - 1.36 (m, 2H), 0.89 - 0.93 (m, 3H);  $^{13}\text{C}$  NMR (100 MHz,  $\text{CDCl}_3$ )  $\delta$  ppm: 172.6, 145.4, 135.2, 129.1, 127.7, 126.4, 126.0, 122.2, 118.2, 104.7, 64.7, 39.5, 33.8, 30.7, 19.2, 13.8; HRMS (EI) Calcd. for  $\text{C}_{17}\text{H}_{21}\text{NO}_2$ :  $[\text{M}^+]$ , 271.1572. Found:  $m/z$  271.1573.

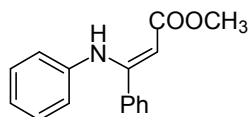

$^1\text{H}$  NMR (500 MHz,  $\text{CDCl}_3$ )  $\delta$  ppm: 10.28 (s, 1H), 7.26 - 7.35 (m, 5H), 7.06 - 7.09 (t, 2H), 6.90 - 6.93 (t, 1H), 6.66 - 6.67 (d,  $J = 7.0$  Hz, 2H), 5.00 (s, 1H), 3.74 (s, 3H);  $^{13}\text{C}$  NMR (500 MHz,  $\text{CDCl}_3$ )  $\delta$  ppm: 170.5, 159.2, 140.4, 136.0, 129.5, 128.7, 128.5, 128.3, 123.2, 122.4, 90.8, 50.8; HRMS (EI) Calcd. for  $\text{C}_{16}\text{H}_{15}\text{NO}_2$ :  $[\text{M}^+]$ , 253.1103. Found:  $m/z$  253.1104.

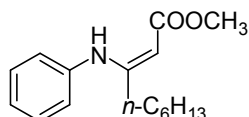

$^1\text{H}$  NMR (500 MHz,  $\text{CDCl}_3$ )  $\delta$  ppm: 10.30 (s, 1H), 7.31 - 7.34 (t, 2H), 7.16 - 7.19 (t, 1H), 7.08 - 7.10 (d,  $J = 10.0$  Hz, 2H), 4.73 (s, 1H), 3.69 (s, 3H), 2.27 - 2.30 (t, 3H), 1.40 - 1.46 (m, 2H), 1.17 - 1.35 (m, 6H), 0.81 - 0.84 (t, 3H);  $^{13}\text{C}$  NMR (500 MHz,  $\text{CDCl}_3$ )  $\delta$  ppm: 171.0, 163.7, 139.3, 129.1, 125.2, 125.1, 84.6, 50.2, 32.2, 31.3, 28.8, 28.0, 22.4, 14.0; HRMS (EI) Calcd. for  $\text{C}_{16}\text{H}_{23}\text{NO}_2$ :  $[\text{M}^+]$ , 261.1729. Found:  $m/z$  261.1724.

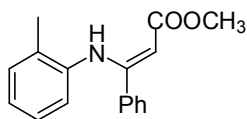

$^1\text{H}$  NMR (500 MHz,  $\text{CDCl}_3$ )  $\delta$  ppm: 10.13 (s, 1H), 7.25 - 7.32 (m, 5H), 7.12 - 7.14 (d,  $J = 7.5$ , 1H), 6.84 - 6.87 (t, 1H), 6.77 - 6.80 (t, 1H), 6.32 - 6.34 (d,  $J = 8.0$  Hz, 1H), 5.03 (s, 1H), 3.75 (s, 3H), 2.42 (s, 3H);  $^{13}\text{C}$  NMR (500 MHz,  $\text{CDCl}_3$ )  $\delta$  ppm: 170.7, 160.0, 139.0, 136.2, 130.5, 130.3, 129.5, 128.4, 128.2, 125.9, 124.0, 123.7, 90.5, 50.7, 18.2; HRMS (EI) Calcd. for  $\text{C}_{17}\text{H}_{17}\text{NO}_2$ :  $[\text{M}^+]$ , 267.1259. Found:  $m/z$  267.1263.

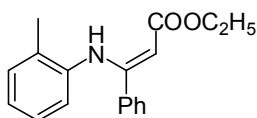

$^1\text{H}$  NMR (500 MHz,  $\text{CDCl}_3$ )  $\delta$  ppm: 10.14 (s, 1H), 7.25 - 7.32 (m, 5H), 7.12 - 7.14 (d,  $J = 7.5$  Hz, 1H), 6.84 - 6.87 (t, 1H), 6.76 - 6.79 (t, 1H), 6.32 - 6.33 (d,  $J = 8.0$  Hz, 1H), 5.03 (s, 1H), 4.19 - 4.23 (q, 3H), 2.42 (s, 3H), 1.30 - 1.33 (t, 2H);  $^{13}\text{C}$  NMR (500 MHz,  $\text{CDCl}_3$ )  $\delta$  ppm: 170.3, 159.9, 139.1, 136.3, 130.5, 129.4, 128.4, 128.1, 125.9, 123.9, 123.6, 110.0, 91.0, 59.3, 18.2, 14.6; HRMS (EI) Calcd. for  $\text{C}_{18}\text{H}_{19}\text{NO}_2$ :  $[\text{M}^+]$ , 281.1416. Found:  $m/z$  281.1419.

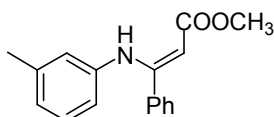

$^1\text{H}$  NMR (500 MHz,  $\text{CDCl}_3$ )  $\delta$  ppm: 10.24 (s, 1H), 7.27 - 7.35 (m, 5H), 6.91 - 6.94 (t, 1H), 6.71 - 6.73 (d,  $J = 7.5$  Hz, 1H), 6.54 (s, 1H), 6.38 - 6.39 (d,  $J = 7.0$  Hz, 1H), 4.98 (s, 1H), 3.74 (s, 3H), 2.16 (s, 3H);  $^{13}\text{C}$  NMR (500 MHz,  $\text{CDCl}_3$ )  $\delta$  ppm: 170.7, 160.0, 139.0, 136.2, 130.5, 130.3, 129.5, 128.4, 128.2, 125.9, 124.0, 123.7, 90.5, 50.7, 15.2; HRMS (EI) Calcd. for  $\text{C}_{17}\text{H}_{17}\text{NO}_2$ :  $[\text{M}^+]$ , 267.1259. Found:  $m/z$  267.1262.

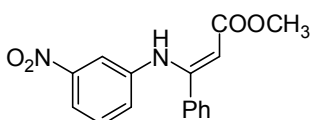

$^1\text{H}$  NMR (500 MHz,  $\text{CDCl}_3$ )  $\delta$  ppm: 10.43 (s, 1H), 7.75 - 7.77 (q, 1H), 7.49 - 7.50 (t, 1H), 7.37 - 7.41 (m, 4H), 7.19 - 7.26 (m, 2H), 6.94 - 6.90 (q, 1H), 5.18 (s, 1H), 3.79 (s, 3H);  $^{13}\text{C}$  NMR (500 MHz,  $\text{CDCl}_3$ )  $\delta$  ppm: 170.2, 157.8, 141.8, 134.9, 130.2, 129.3,

128.9, 128.0, 127.1, 117.2, 116.0, 100.0, 93.6, 51.0; HRMS (EI) Calcd. for  $C_{16}H_{14}N_2O_4$ :  $[M^+]$ , 298.0954. Found:  $m/z$  298.0953.

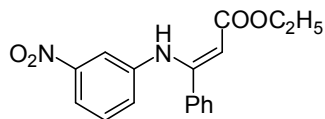

$^1H$  NMR (500 MHz,  $CDCl_3$ )  $\delta$  ppm: 10.44 (s, 1H), 7.72 - 7.74 (t, 1H), 7.46 - 7.47 (t, 1H), 7.32 - 7.40 (m, 5H), 7.20 - 7.23 (t, 1H), 6.91 - 6.93 (q, 1H), 5.15 (s, 1H), 4.21 - 4.25 (q, 2H), 1.32 - 1.34 (t, 3H);  $^{13}C$  NMR (500 MHz,  $CDCl_3$ )  $\delta$  ppm: 169.8, 157.6, 148.5, 141.9, 135.0, 130.1, 129.3, 128.9, 128.0, 127.0, 117.1, 115.9, 94.2, 59.7, 14.4; HRMS (EI) Calcd. for  $C_{17}H_{16}N_2O_4$ :  $[M^+]$ , 312.1110. Found:  $m/z$  312.1111.

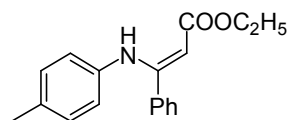

$^1H$  NMR (500 MHz,  $CDCl_3$ )  $\delta$  ppm: 10.25 (s, 1H), 7.26 - 7.34 (m, 5H), 6.87 - 6.88 (d,  $J = 8.0$  Hz, 2H), 6.55 - 6.57 (d,  $J = 8.0$  Hz, 2H), 4.95 (s, 1H), 4.18 - 4.22 (q, 2H), 2.20 (s, 3H), 1.30 - 1.33 (t, 3H);  $^{13}C$  NMR (500 MHz,  $CDCl_3$ )  $\delta$  ppm: 170.2, 159.4, 137.8, 136.2, 132.6, 129.3, 129.2, 128.4, 128.3, 122.4, 90.4, 59.2, 20.7, 14.6; HRMS (EI) Calcd. for  $C_{18}H_{19}NO_2$ :  $[M^+]$ , 281.1416. Found:  $m/z$  281.1411.

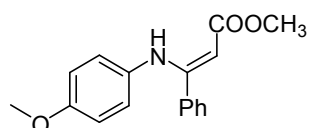

$^1H$  NMR (500 MHz,  $CDCl_3$ )  $\delta$  ppm: 10.20 (s, 1H), 7.24 - 7.31 (m, 5H), 6.63 (t, 4H), 4.94 (s, 1H), 3.73 (s, 3H), 3.69 (s, 3H);  $^{13}C$  NMR (500 MHz,  $CDCl_3$ )  $\delta$  ppm: 170.6, 160.0, 155.9, 136.0, 133.4, 129.3, 128.4, 128.3, 124.3, 113.9, 89.2, 55.2, 50.5; HRMS (EI) Calcd. for  $C_{17}H_{17}NO_3$ :  $[M^+]$ , 283.1208. Found:  $m/z$  283.1206.

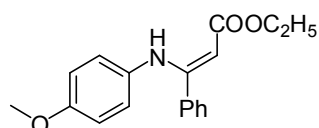

$^1H$  NMR (500 MHz,  $CDCl_3$ )  $\delta$  ppm: 10.22 (s, 1H), 7.24 - 7.32 (m, 5H), 6.63 (t, 4H), 4.93 (s, 1H), 4.18 - 4.22 (q, 2H), 3.70 (s, 3H), 1.30 - 1.33 (t, 3H);  $^{13}C$  NMR (500 MHz,



CDCl<sub>3</sub>)  $\delta$  ppm: 170.3, 159.9, 155.9, 136.1, 133.5, 129.2, 128.4, 128.3, 124.3, 113.9, 89.7, 59.1, 55.2, 14.6; HRMS (EI) Calcd. for C<sub>18</sub>H<sub>19</sub>NO<sub>3</sub>: [M<sup>+</sup>], 297.1365. Found: m/z 297.1361.

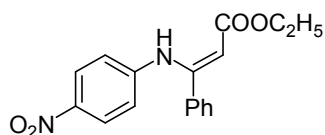

<sup>1</sup>H NMR (500 MHz, CDCl<sub>3</sub>)  $\delta$  ppm: 10.44 (s, 1H), 7.72 - 7.74 (d, 1H), 7.34 - 7.46 (m, 1H), 7.20 - 7.26 (m, 6H), 6.91 - 6.93 (d, J = 9.0 Hz, 1H), 5.15 (s, 1H), 4.21 - 4.25 (q, 2H), 1.32-1.34 (t, 3H); <sup>13</sup>C NMR (500 MHz, CDCl<sub>3</sub>)  $\delta$  ppm: 169.5, 156.5, 146.7, 141.9, 135.0, 130.3, 129.0, 127.8, 124.8, 119.7, 96.2, 59.9, 14.4; HRMS (EI) Calcd. for C<sub>17</sub>H<sub>16</sub>N<sub>2</sub>O<sub>4</sub>: [M<sup>+</sup>], 312.1110. Found: m/z 312.1109.

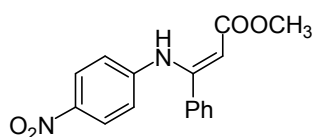

<sup>1</sup>H NMR (500 MHz, CDCl<sub>3</sub>) ppm: 10.52 (s, 1H), 7.97 - 7.99 (d, J = 7.5 Hz, 2H), 7.34 - 7.47 (m, 5H), 6.64 - 6.66 (d, J = 7.5 Hz, 1H), 5.23 (s, 1H), 3.80 (s, 3H); <sup>13</sup>C NMR (500 MHz, CDCl<sub>3</sub>)  $\delta$  ppm: 169.9, 156.8, 146.6, 142.1, 135.0, 130.3, 129.1, 127.9, 124.8, 119.9, 95.6, 51.1; HRMS (EI) Calcd. for C<sub>17</sub>H<sub>16</sub>N<sub>2</sub>O<sub>4</sub>: [M<sup>+</sup>], 312.1110. Found: m/z 312.1109.

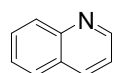

<sup>1</sup>H NMR (400 MHz, CDCl<sub>3</sub>)  $\delta$  ppm: 8.93 (q, 1H), 8.16 (d, J = 8.3 Hz, 1H), 8.12 (d, J = 8.6 Hz, 1H), 7.82 (d, J = 8.1 Hz, 1H), 7.72 (m, 1H), 7.58 - 7.52 (m, 1H), 7.40 (q, 1H); <sup>13</sup>C NMR (100 MHz, CDCl<sub>3</sub>)  $\delta$  ppm: 150.42, 148.28, 136.02, 129.46, 129.44, 128.26, 127.79, 126.52, 121.06; HRMS (EI) Calcd. for C<sub>13</sub>H<sub>9</sub>NO<sub>2</sub>: [M<sup>+</sup>], 129.0578. Found: m/z 129.0579.

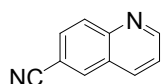

$^1\text{H}$  NMR (400 MHz,  $\text{CDCl}_3$ )  $\delta$  ppm:  $\delta$  9.05 (q, 1H), 8.24-8.21 (m, 2H), 8.19 (d,  $J$  = 8.8 Hz, 1H), 7.86 (q, 1H), 7.54 (q, 1H);  $^{13}\text{C}$  NMR (100 MHz,  $\text{CDCl}_3$ )  $\delta$  ppm: 153.4, 149.3, 136.5, 134.2, 131.2, 130.3, 127.7, 122.9, 118.6, 110.5; HRMS (EI) Calcd. for  $\text{C}_{10}\text{H}_6\text{N}_2$ :  $[\text{M}^+]$ , 154.0531. Found:  $m/z$  154.0529.

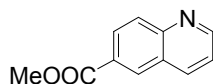

$^1\text{H}$  NMR (400 MHz,  $\text{CDCl}_3$ )  $\delta$  ppm:  $\delta$  8.98 (q, 1H), 8.57 (d,  $J$  = 1.8 Hz, 1H), 8.27 (q, 1H), 8.24 (d,  $J$  = 8.3 Hz, 1H), 8.12 (d,  $J$  = 8.8 Hz, 1H), 7.45 (q, 1H), 3.97 (s, 3H);  $^{13}\text{C}$  NMR (100 MHz,  $\text{CDCl}_3$ )  $\delta$  ppm: 170.2, 152.6, 148.3, 136.2, 133.4, 131.6, 130.4, 126.7, 121.6, 119.4, 51.3; HRMS (EI) Calcd. for  $\text{C}_{11}\text{H}_9\text{NO}_2$ :  $[\text{M}^+]$ , 187.0633. Found:  $m/z$  187.00635.

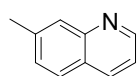

$^1\text{H}$  NMR (400 MHz,  $\text{CDCl}_3$ )  $\delta$  ppm:  $\delta$  8.82 (q, 1H), 8.00 (t, 2H), 7.57 - 7.45 (m, 2H), 7.30 (q, 1H), 2.49 (s, 3H);  $^{13}\text{C}$  NMR (100 MHz,  $\text{CDCl}_3$ )  $\delta$  ppm: 149.53, 146.90, 136.34, 135.32, 131.71, 129.11, 128.29, 126.58, 121.04, 21.57; HRMS (EI) Calcd. for  $\text{C}_{10}\text{H}_9\text{N}$ :  $[\text{M}^+]$ , 144.0808. Found:  $m/z$  144.0809.

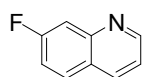

$^1\text{H}$  NMR (400 MHz,  $\text{CDCl}_3$ )  $\delta$  ppm: 8.89 (q, 1H), 8.13 (q, 1H), 7.79 (q, 1H), 7.71 (q, 1H), 7.37-7.29 (m, 2H);  $^{13}\text{C}$  NMR (100 MHz,  $\text{CDCl}_3$ )  $\delta$  ppm: 162.9, 151.3, 149.1, 136.0, 129.8, 125.3, 120.4, 117.2, 113.0; HRMS (EI) Calcd. for  $\text{C}_9\text{H}_6\text{NF}$ :  $[\text{M}^+]$ , 147.00484. Found:  $m/z$  147.0489.

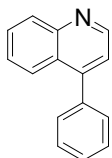

$^1\text{H}$  NMR (400 MHz,  $\text{CDCl}_3$ )  $\delta$  ppm: 8.78 (d,  $J = 4.4$  Hz, 1H), 8.11 (d,  $J = 8.5$  Hz, 1H), 8.00 (q, 1H), 7.71 (m, 1H), 7.57 (m, 1H), 7.23 (m, 1H), 2.71 (s, 3H);  $^{13}\text{C}$  NMR (400 MHz,  $\text{CDCl}_3$ )  $\delta$  ppm: 150.20, 147.99, 144.31, 130.03, 129.12, 128.29, 126.29, 123.82, 121.87, 18.69; HRMS (EI) Calcd. for  $\text{C}_{10}\text{H}_9\text{N}$ :  $[\text{M}^+]$ , 144.0808. Found:  $m/z$  144.0812.

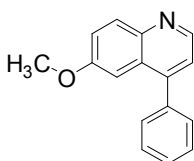

$^1\text{H}$  NMR (400 MHz,  $\text{CDCl}_3$ )  $\delta$  ppm: 8.06 - 8.14 (t, 4H), 7.83 (d,  $J = 8.4$  Hz, 1H), 7.50 - 7.53 (t, 2H), 7.43 - 7.46 (m, 1H), 7.37 - 7.40 (m, 1H), 7.09 (d,  $J = 2.8$  Hz, 1H), 3.94 (s, 3H);  $^{13}\text{C}$  NMR (400 MHz,  $\text{CDCl}_3$ )  $\delta$  ppm: 157.7, 155.1, 144.4, 139.8, 135.6, 131.2, 129.0, 128.8, 127.3, 122.4, 119.3, 114.1, 105.0, 55.6; HRMS (EI) Calcd. for  $\text{C}_{26}\text{H}_{13}\text{NO}$ :  $[\text{M}^+]$ , 235.0997. Found:  $m/z$  235.0995.

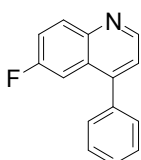

$^1\text{H}$  NMR (400 MHz,  $\text{CDCl}_3$ )  $\delta$  ppm: 8.13 - 8.18 (m, 4H), 7.87 (d,  $J = 8.8$  Hz, 1H), 7.41 - 7.54 (m, 5H);  $^{13}\text{C}$  NMR (400 MHz,  $\text{CDCl}_3$ )  $\delta$  ppm: 161.6, 159.1, 156.7, 145.4, 139.4, 136.2, 132.2, 129.4, 128.9, 127.5, 120.0, 119.7, 110.4; HRMS (EI) Calcd. for  $\text{C}_{15}\text{H}_{10}\text{NF}$ :  $[\text{M}^+]$ , 223.0797. Found:  $m/z$  223.0792.

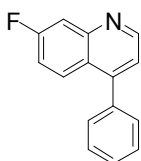

$^1\text{H}$  NMR (400 MHz,  $\text{CDCl}_3$ )  $\delta$  ppm: 8.13 - 8.18 (m, 3H), 7.77-7.83 (m, 3H), 7.47 -

7.54 (m, 3H), 7.24 - 7.32 (m, 1H);  $^{13}\text{C}$  NMR (400 MHz,  $\text{CDCl}_3$ )  $\delta$  ppm: 164.5, 162.1, 158.3, 149.2, 139.3, 136.7, 129.6, 129.5, 129.4, 128.9, 127.6, 124.2, 118.3, 116.9, 116.6, 113.4, 113.2; HRMS (EI) Calcd. for  $\text{C}_{15}\text{H}_{10}\text{NF}$ :  $[\text{M}^+]$ , 223.0797. Found:  $m/z$  223.0794.

**$^1\text{H}$  and  $^{13}\text{C}$  spectra of spectra**

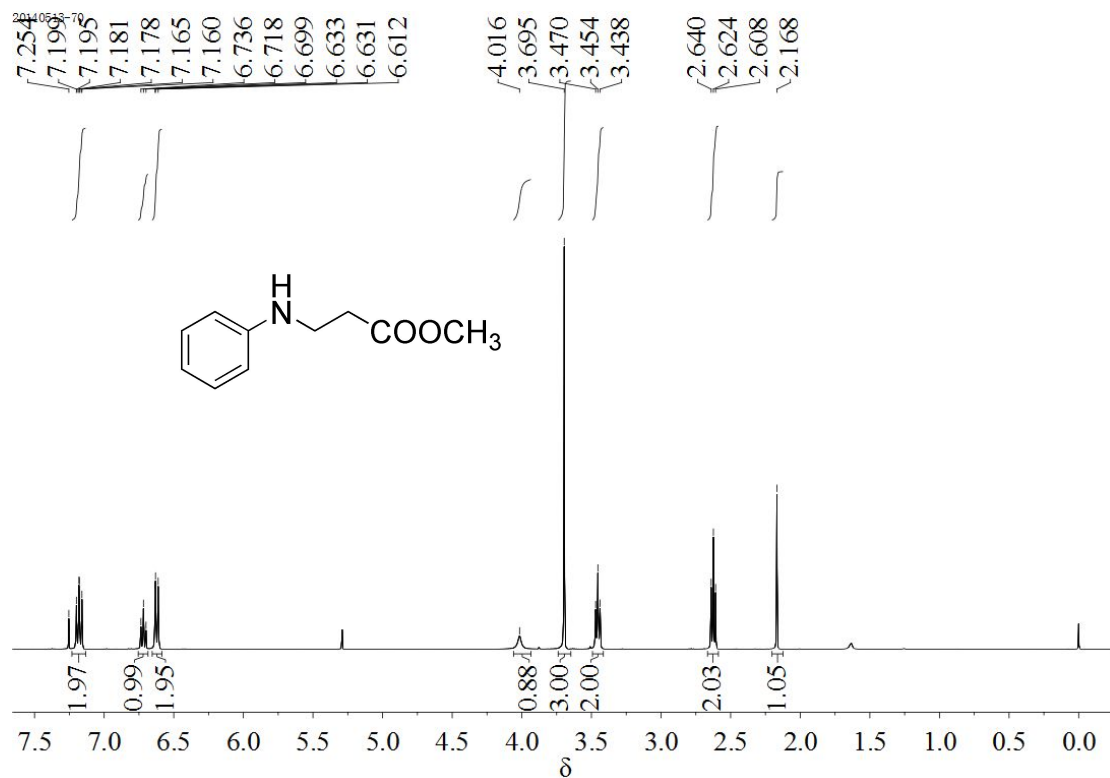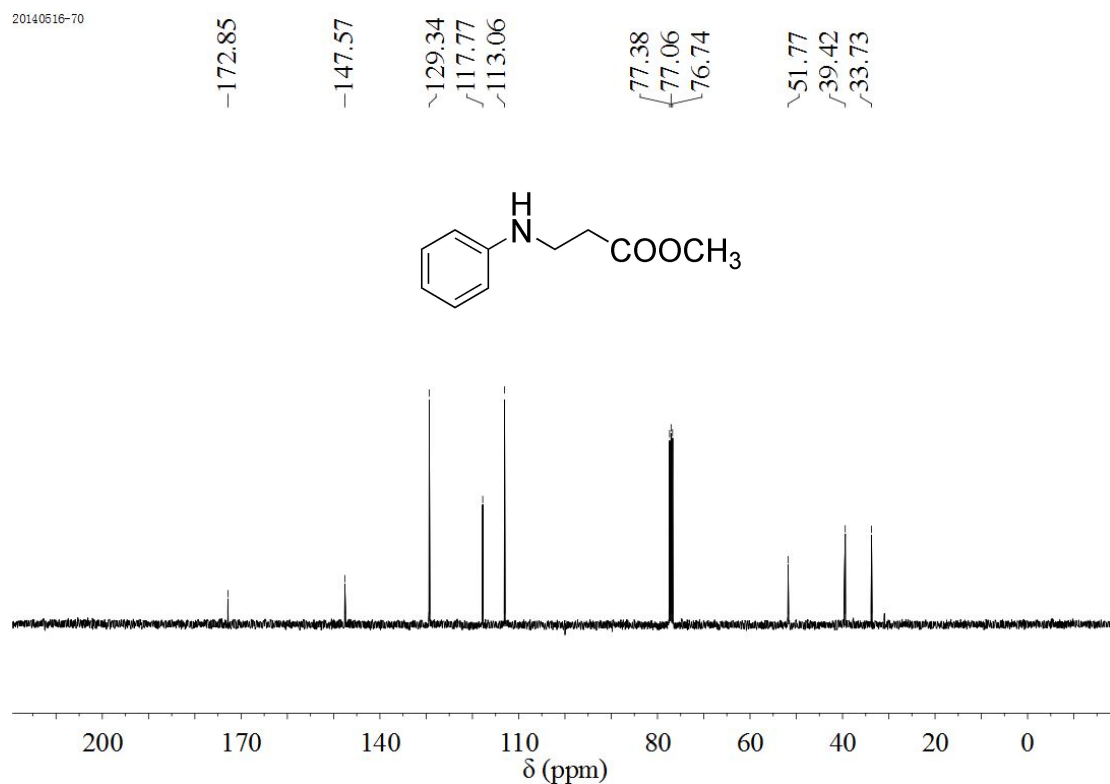

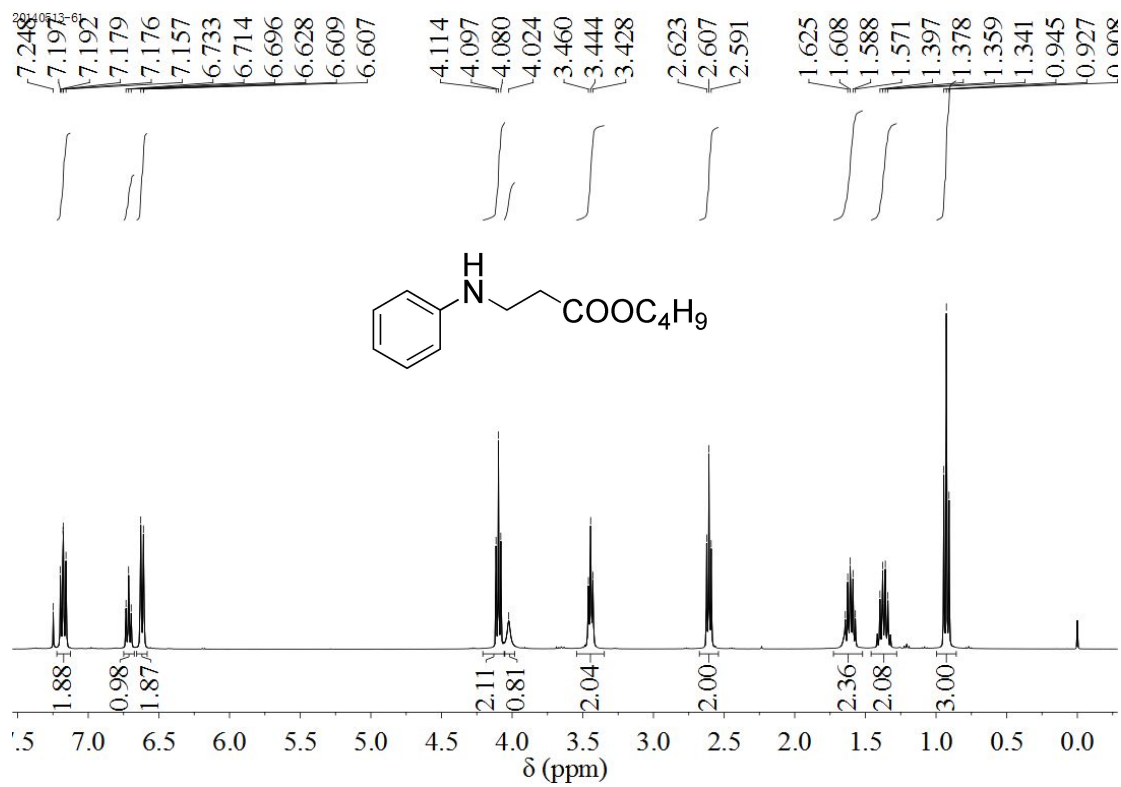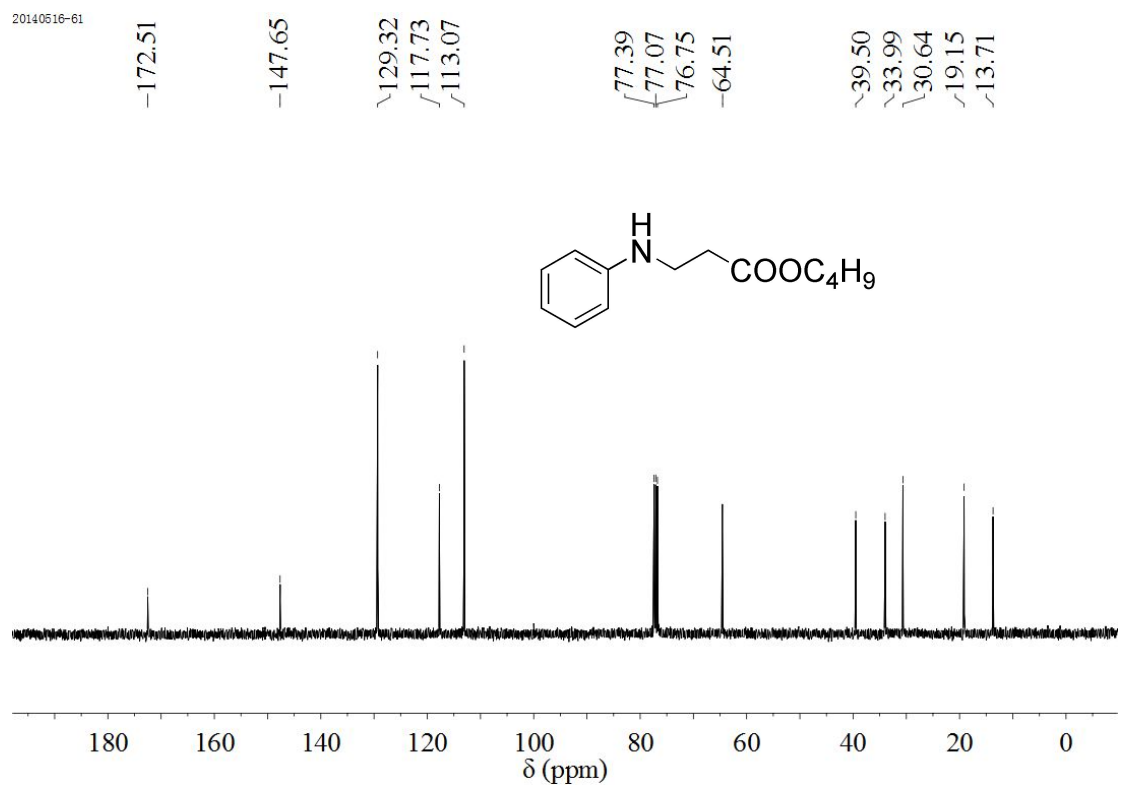

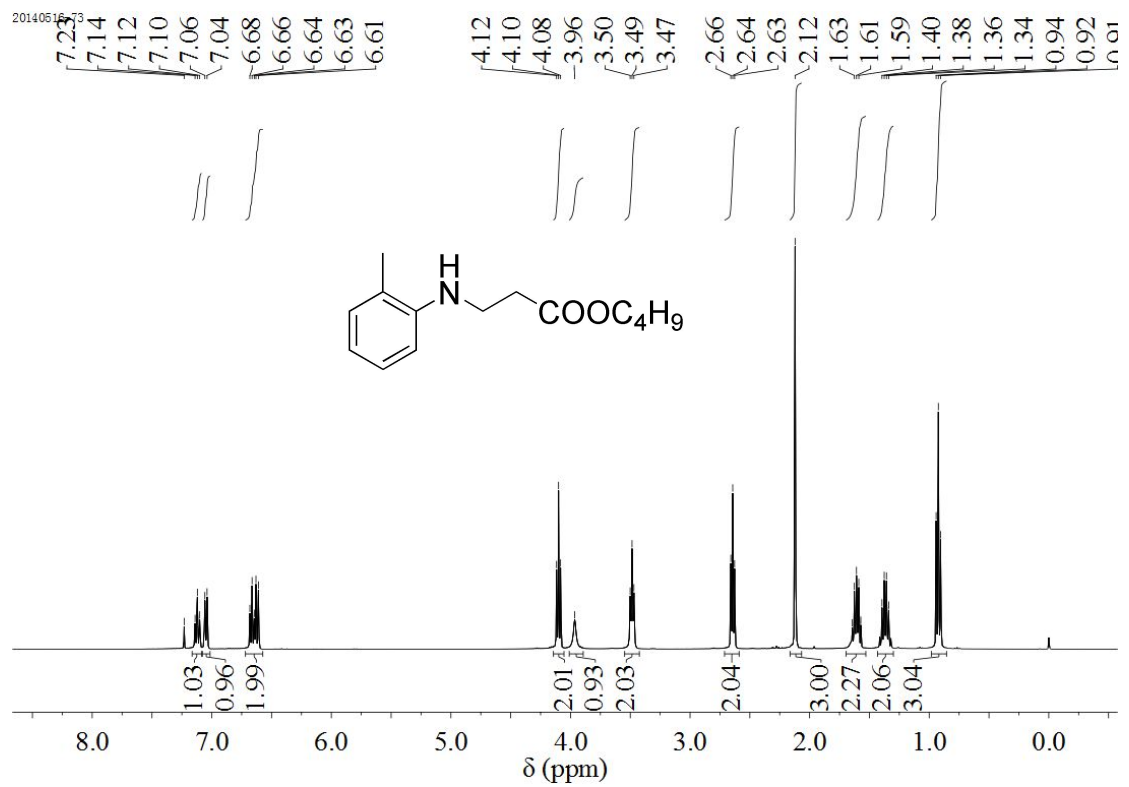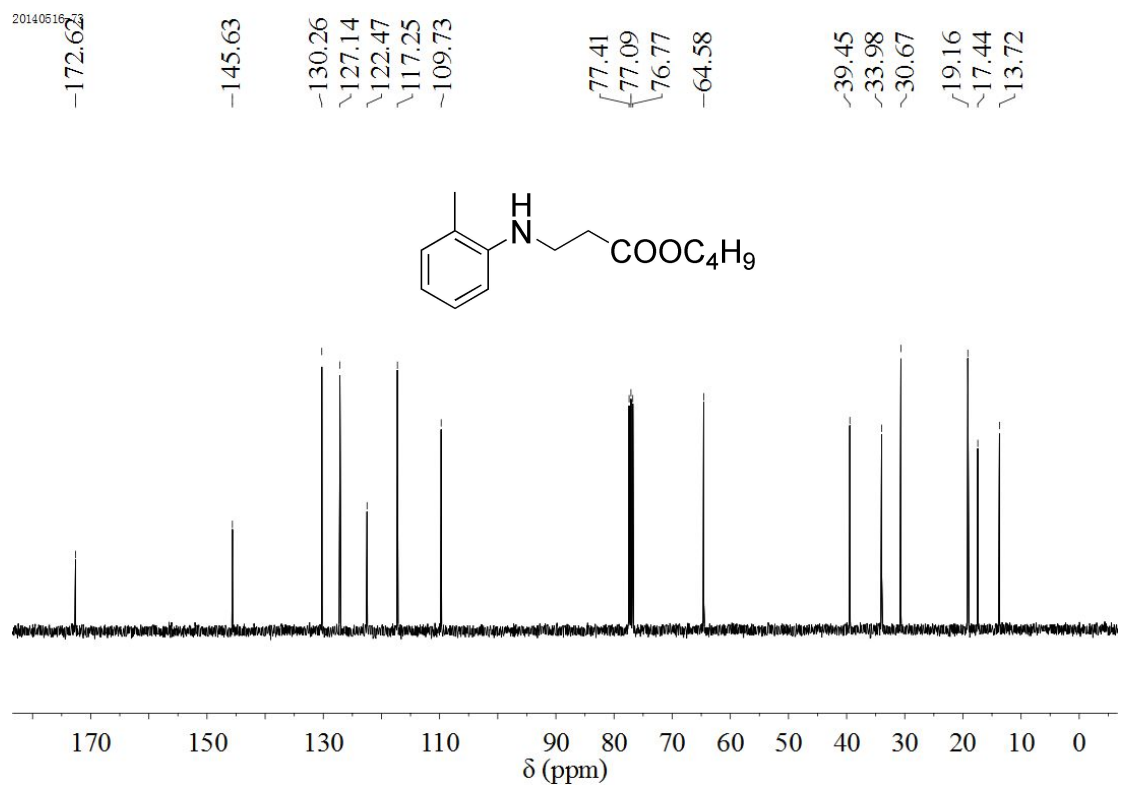

20140430-44

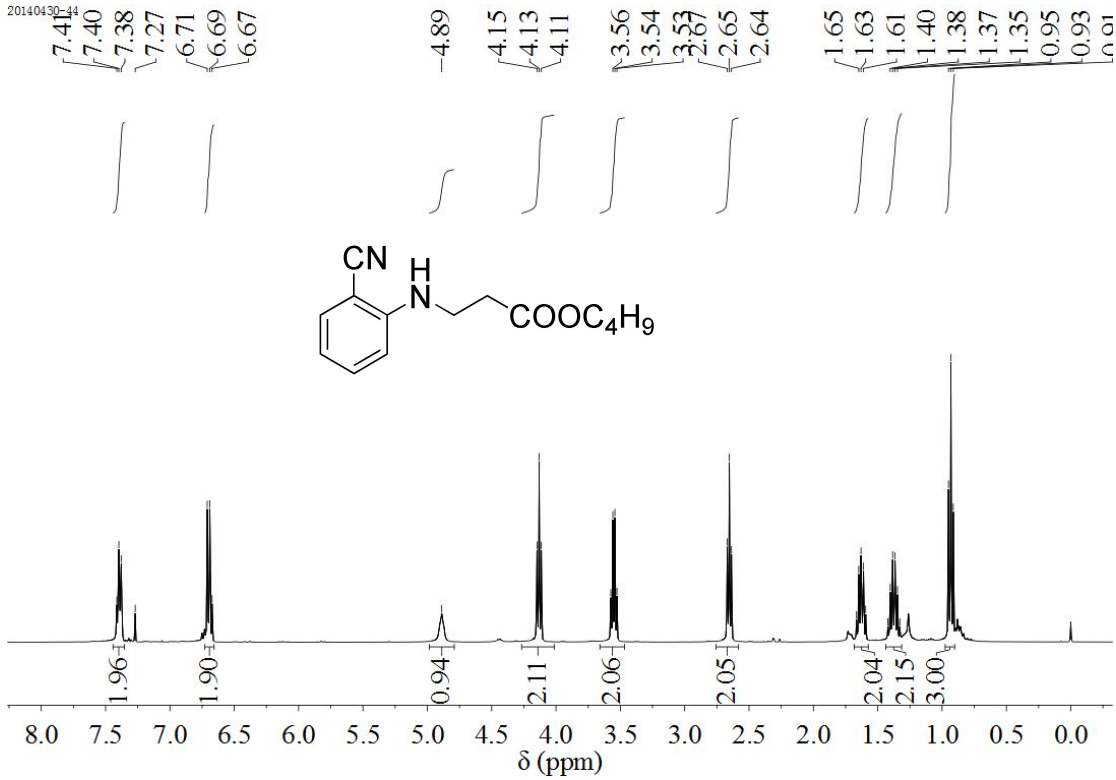

20140707-44

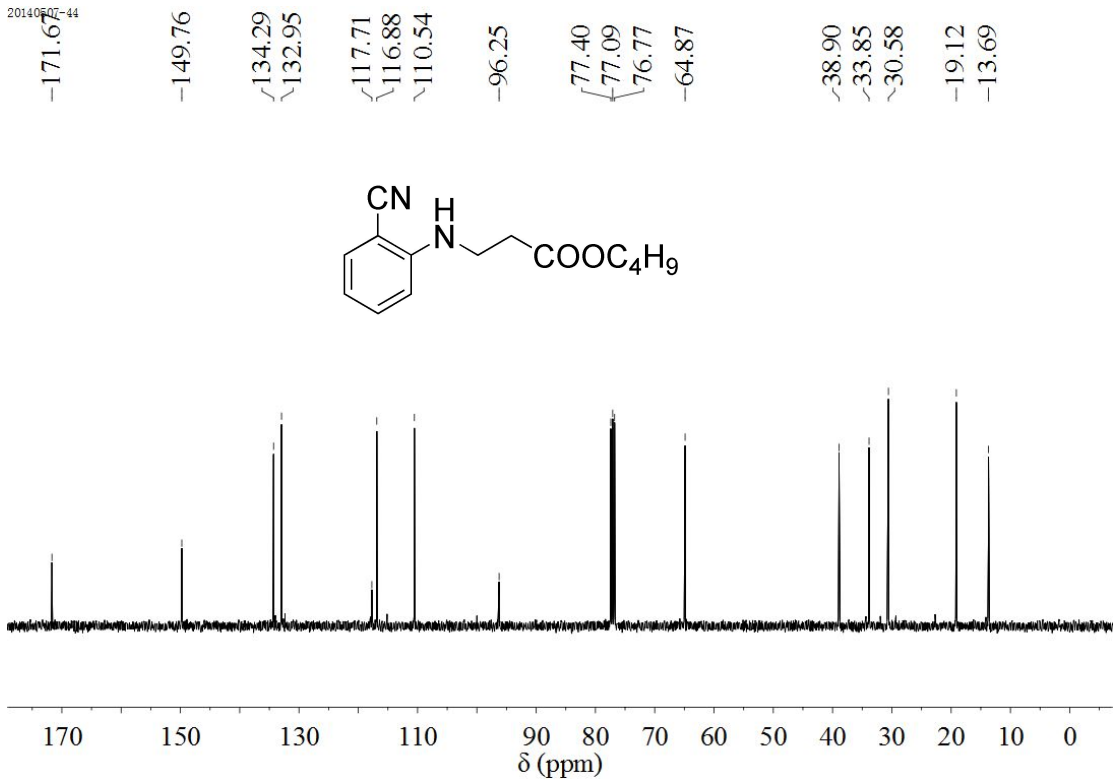



20140513-65

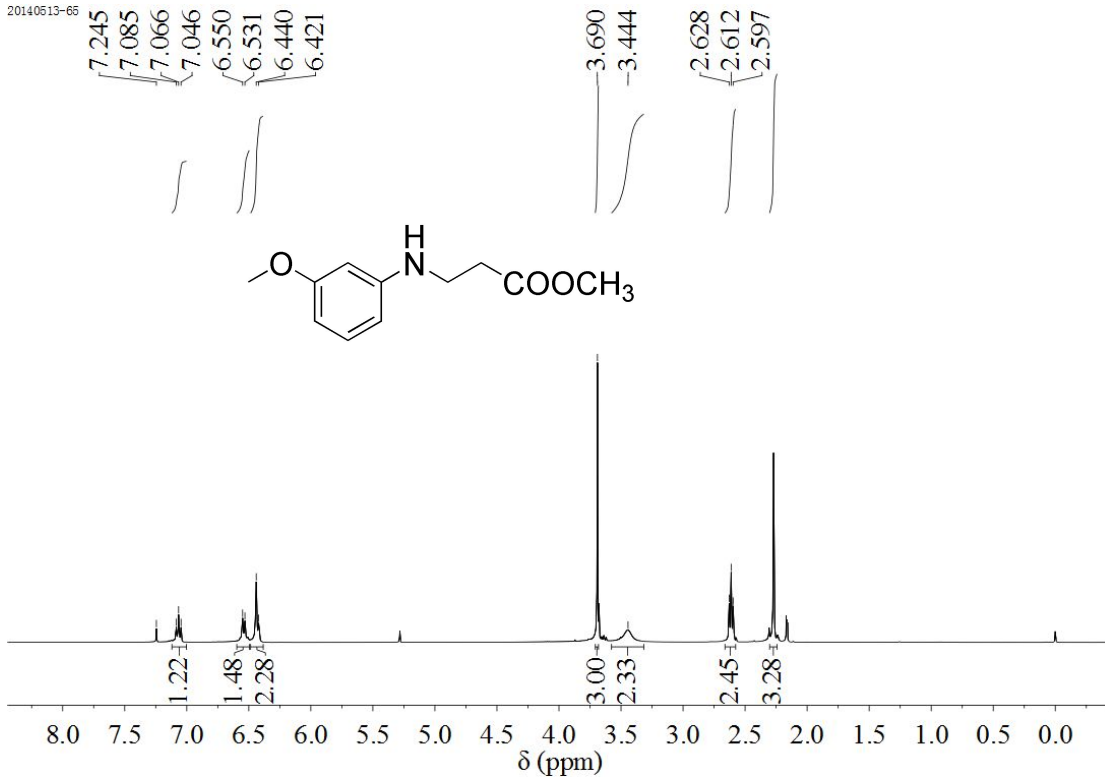

20140516-65

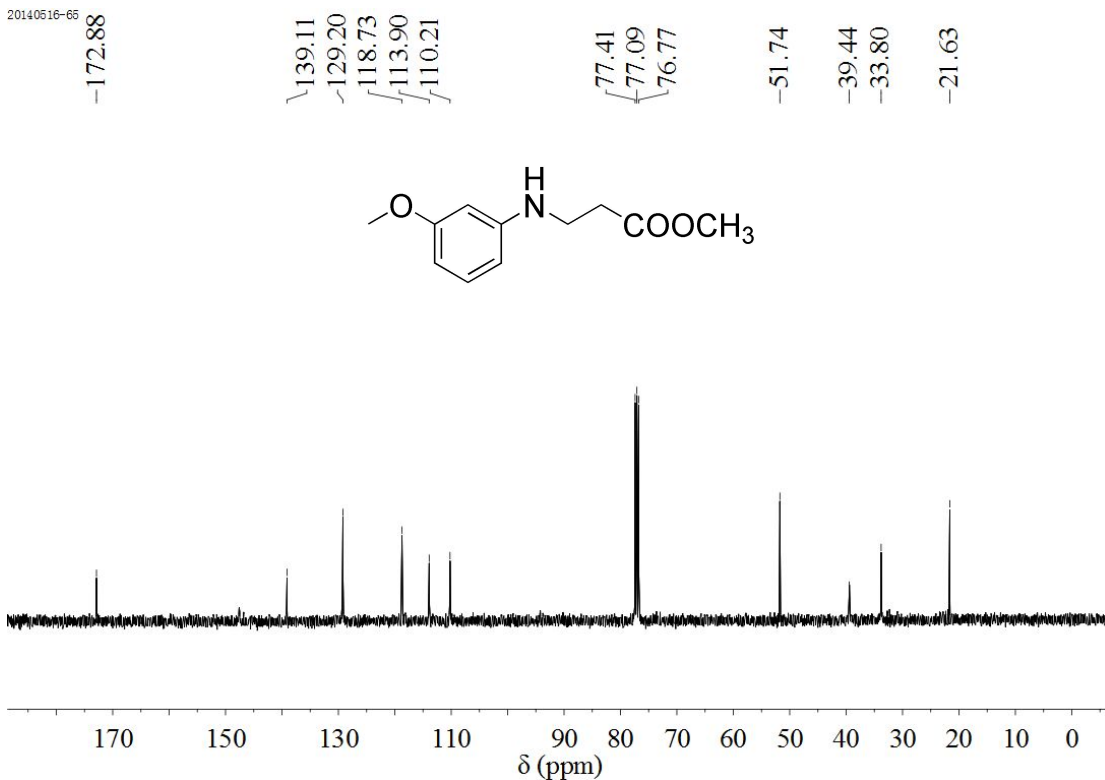

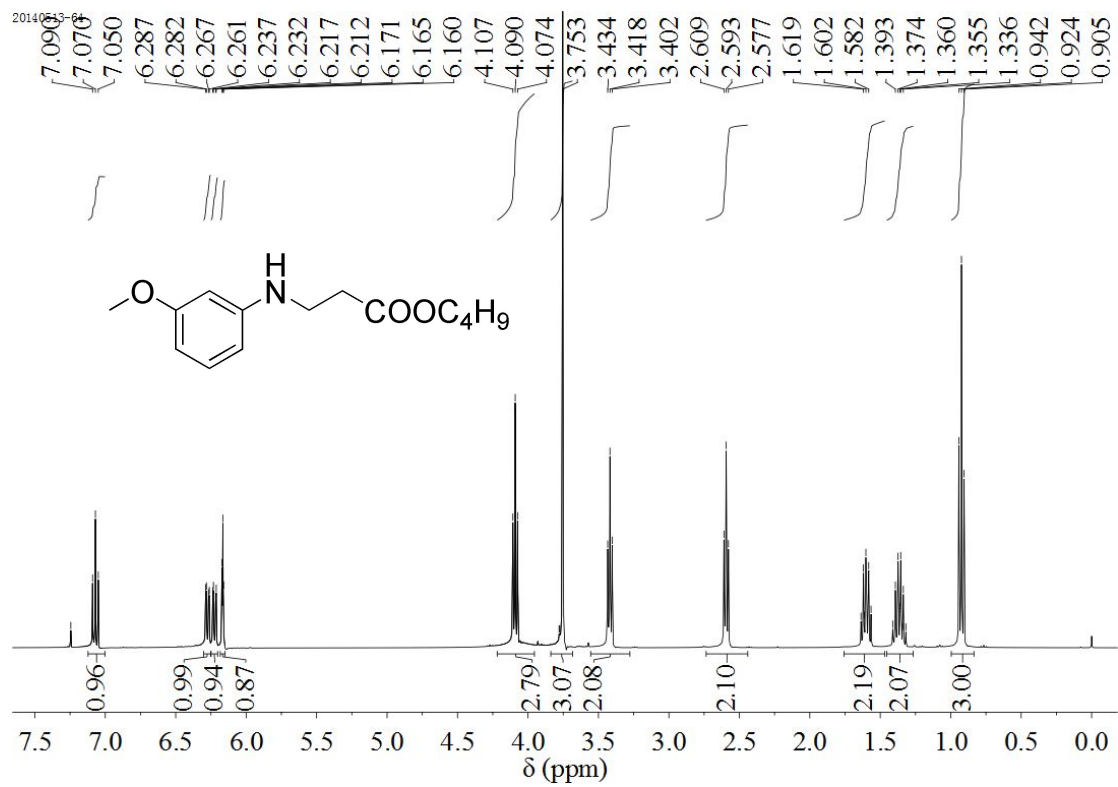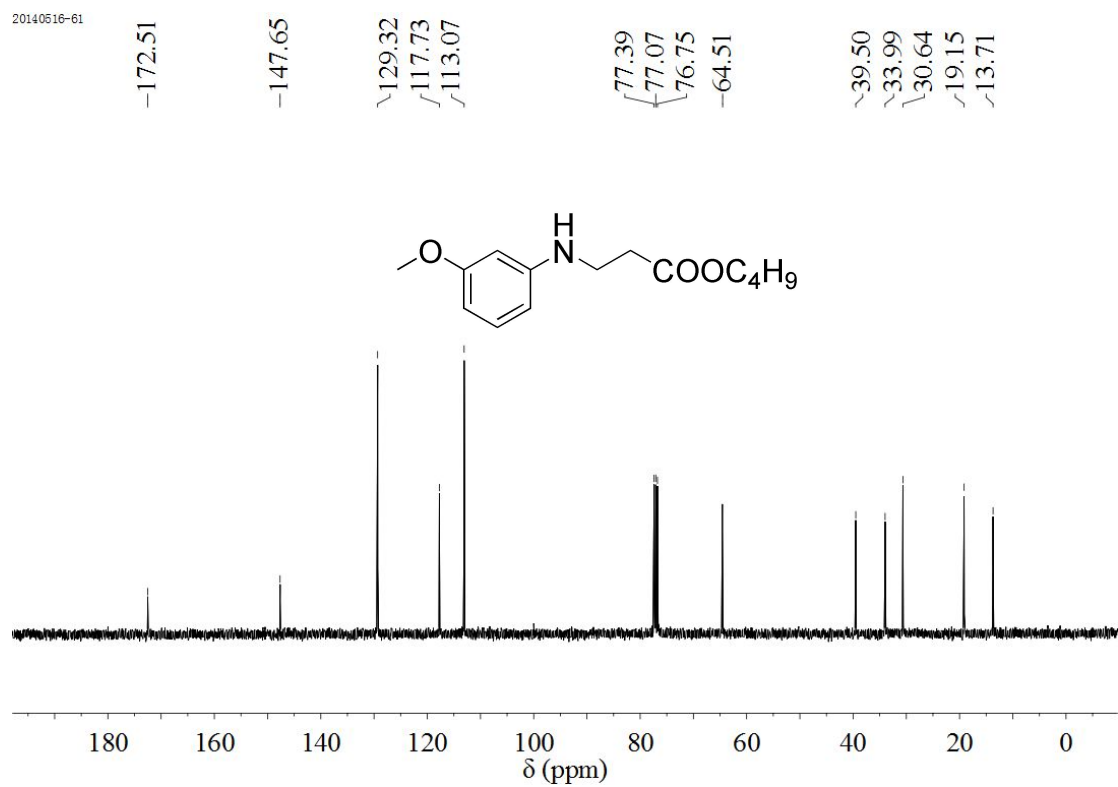

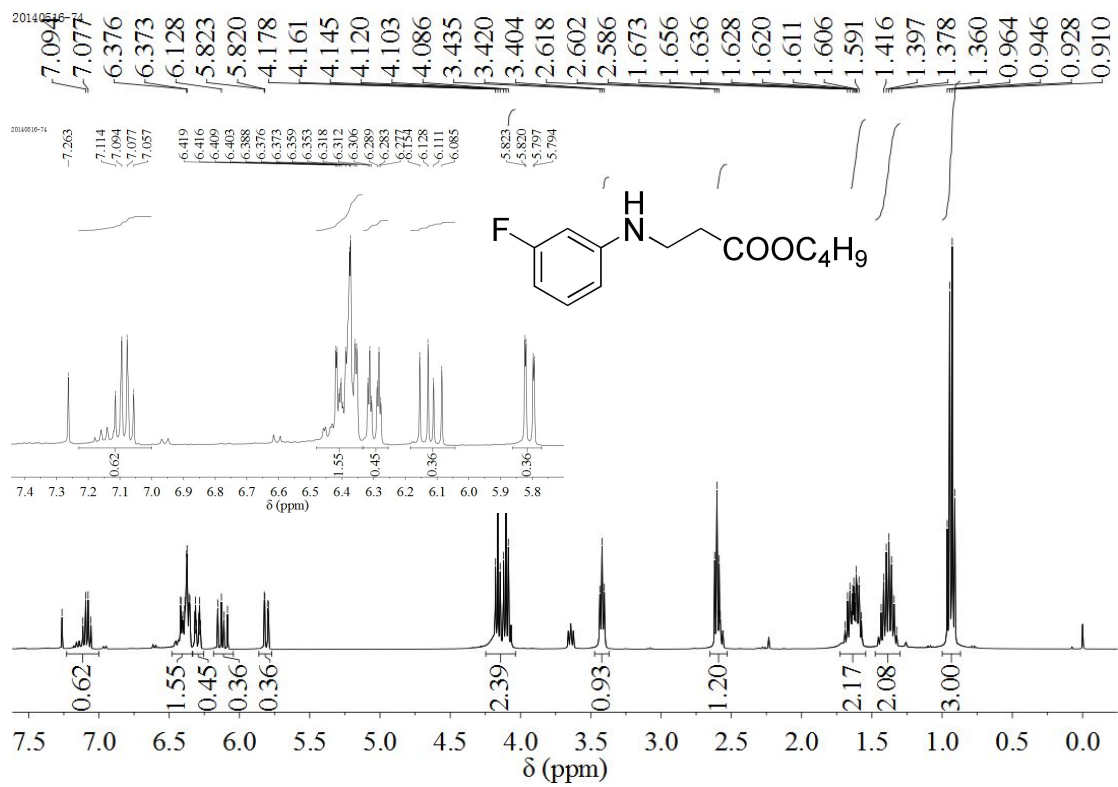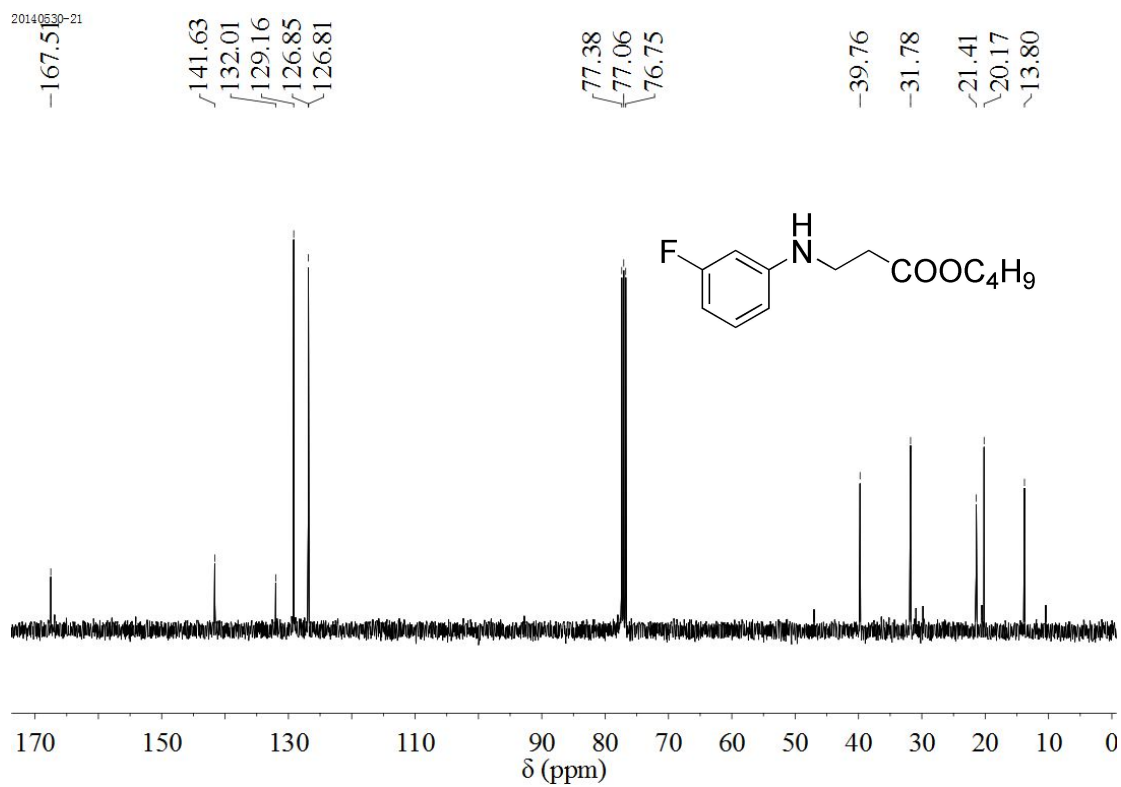

20140513-67

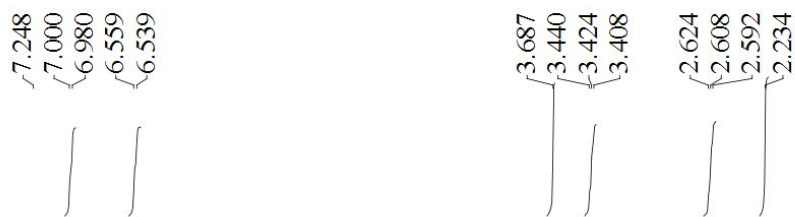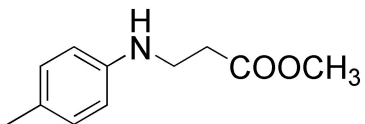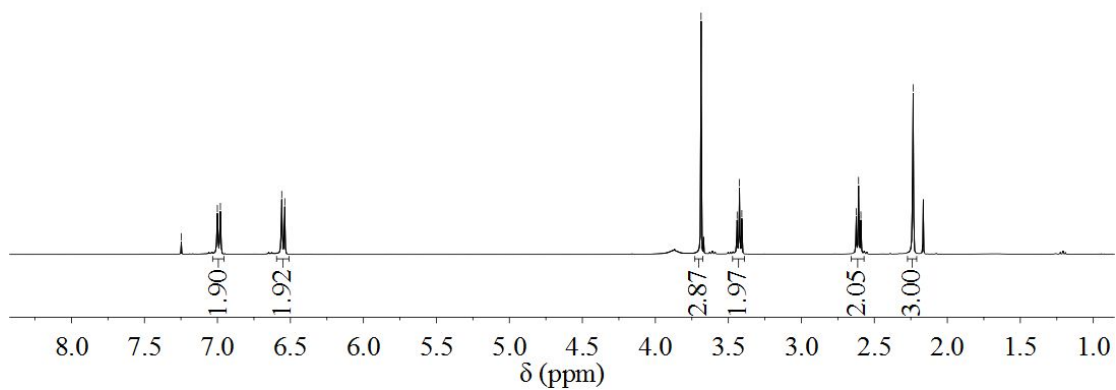

20140516-02

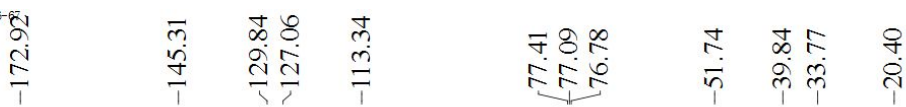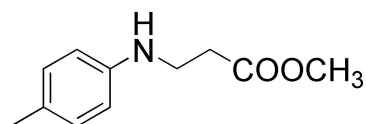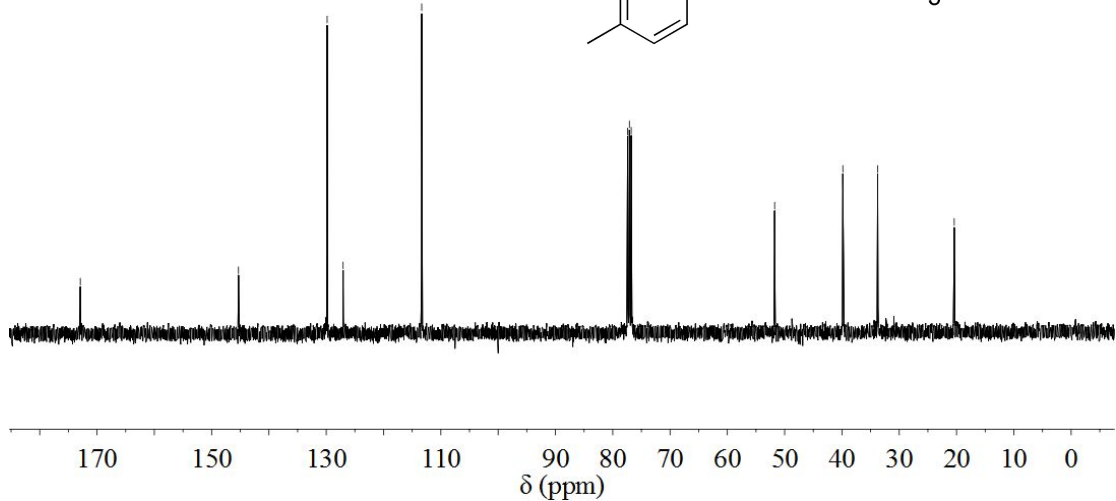

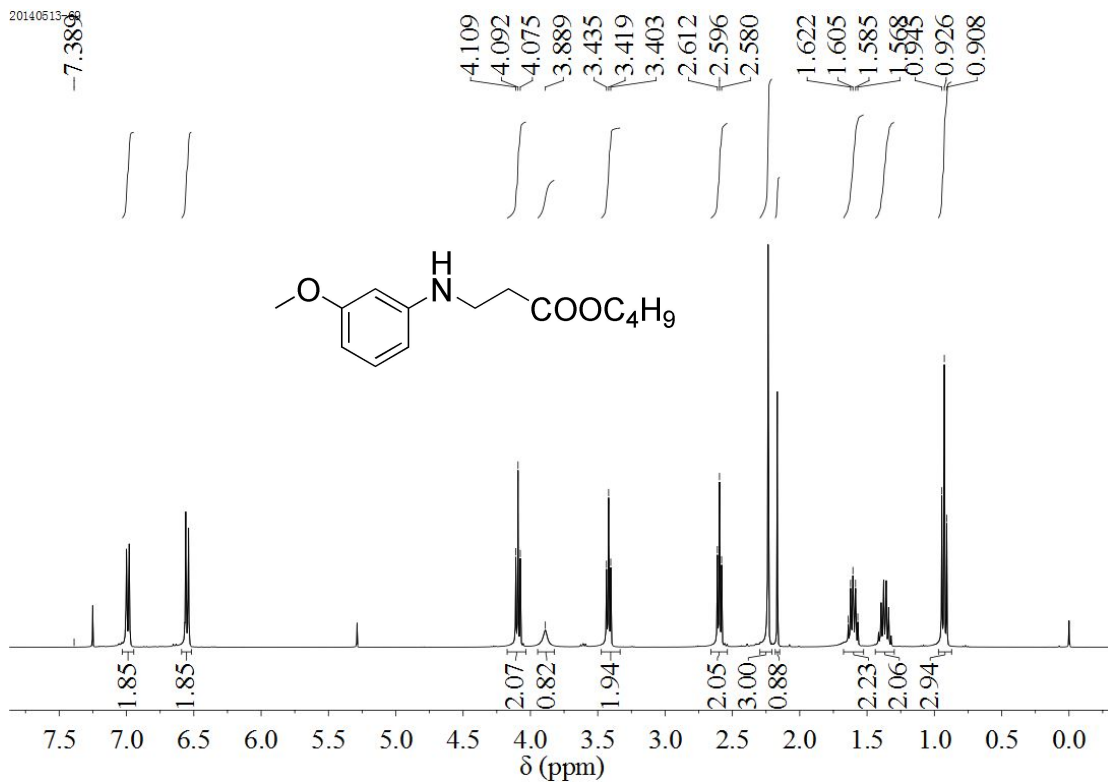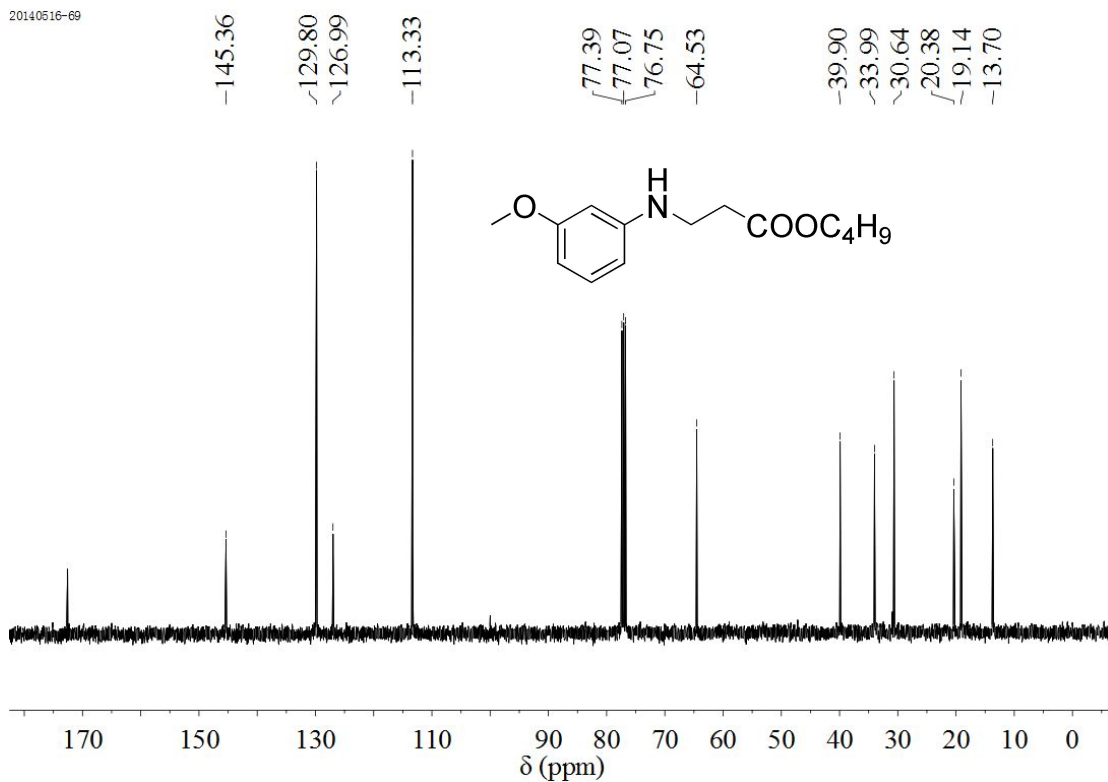

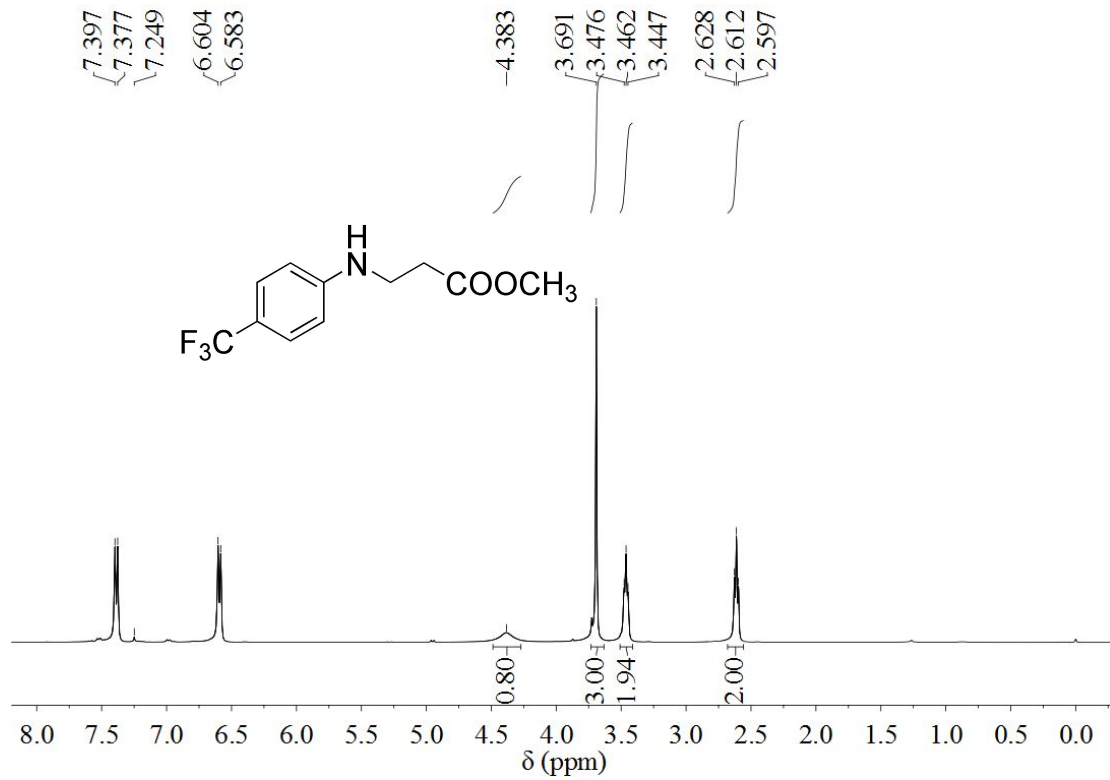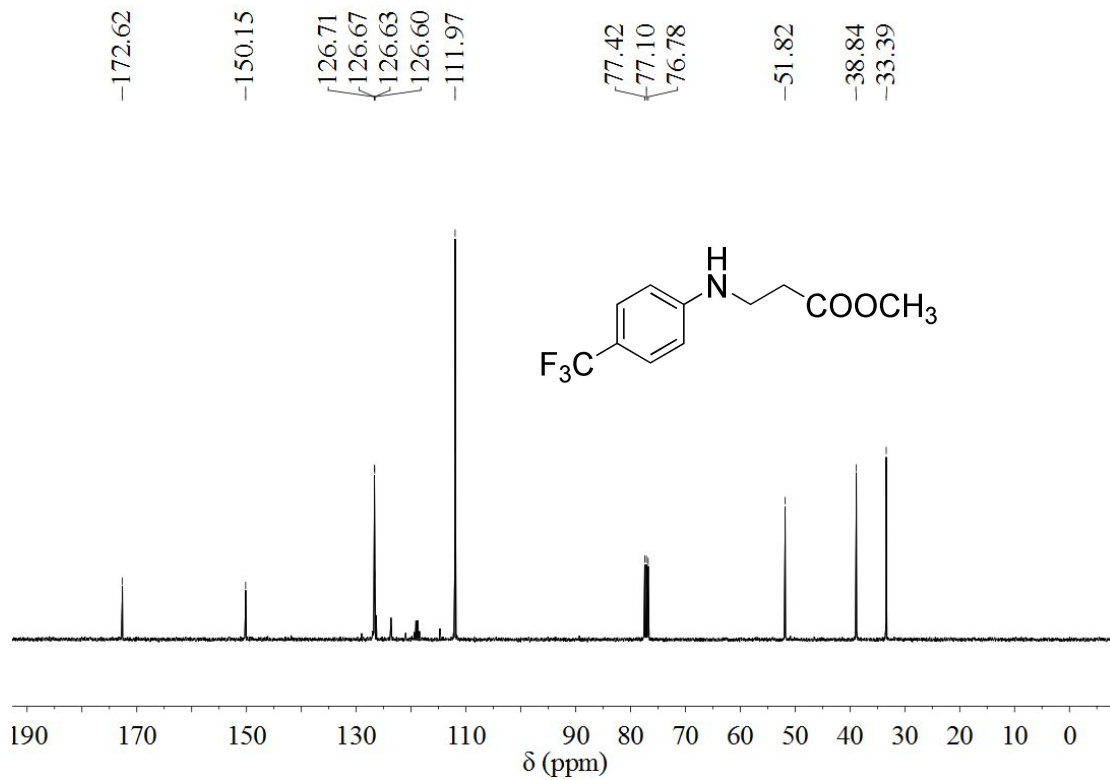

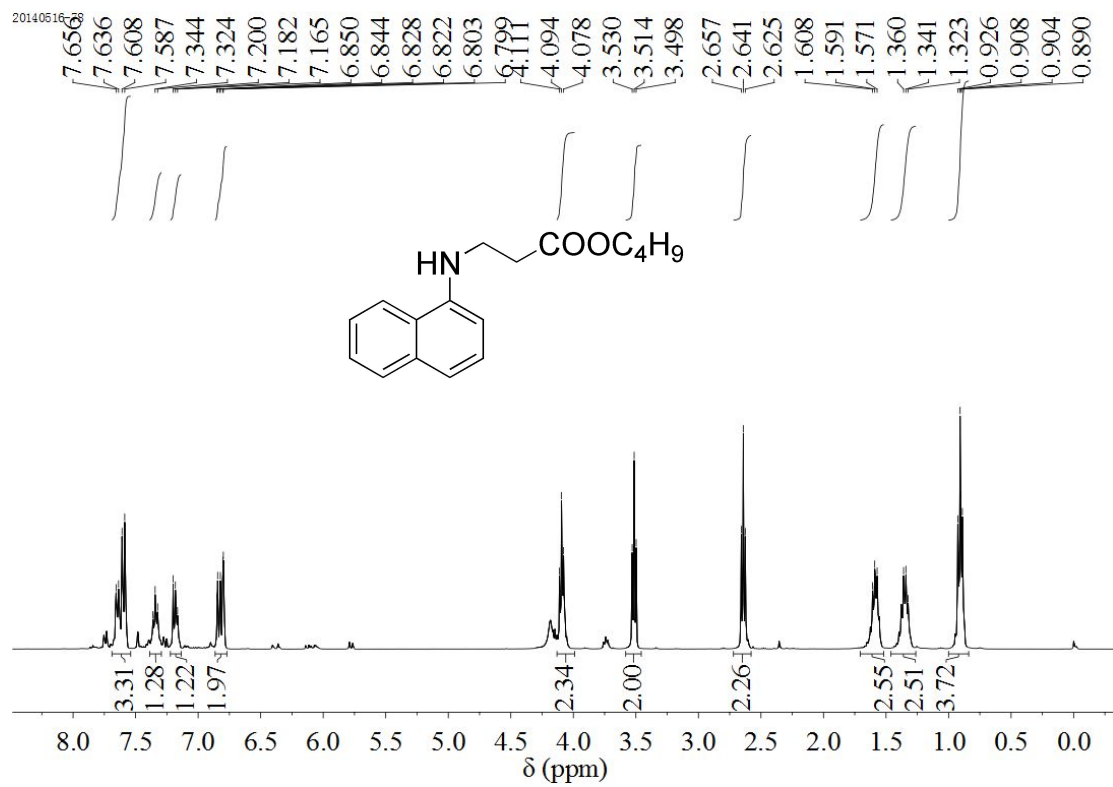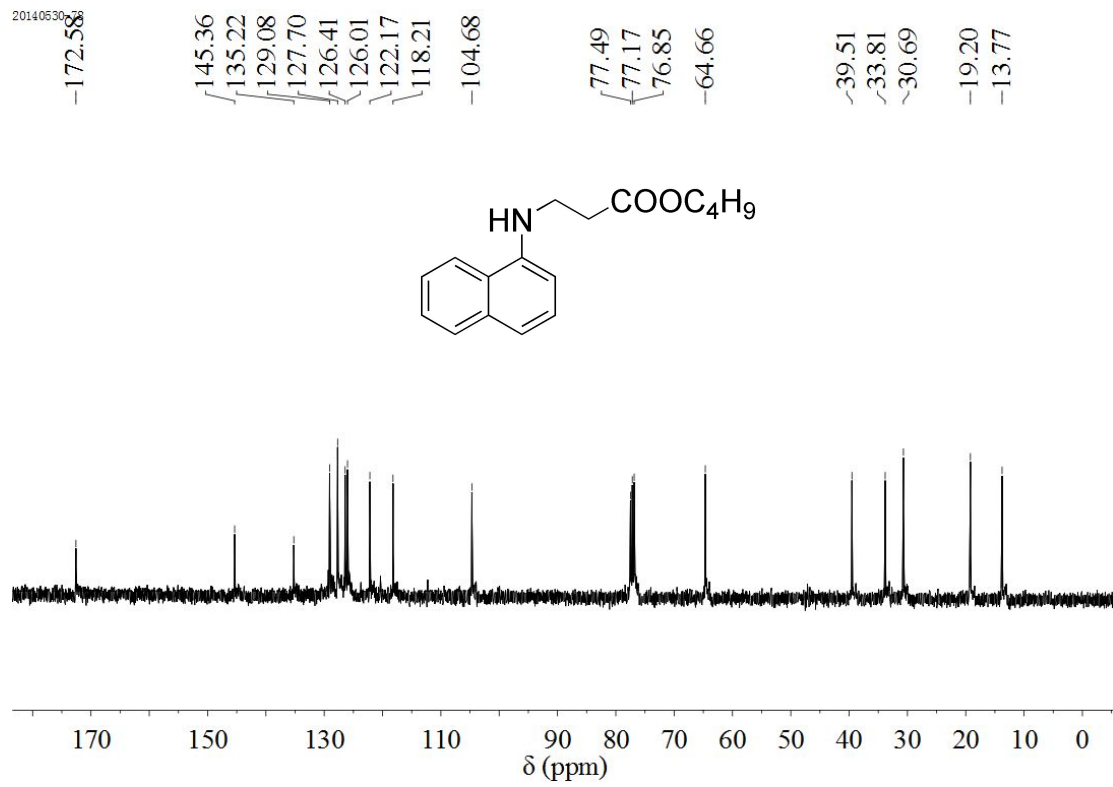

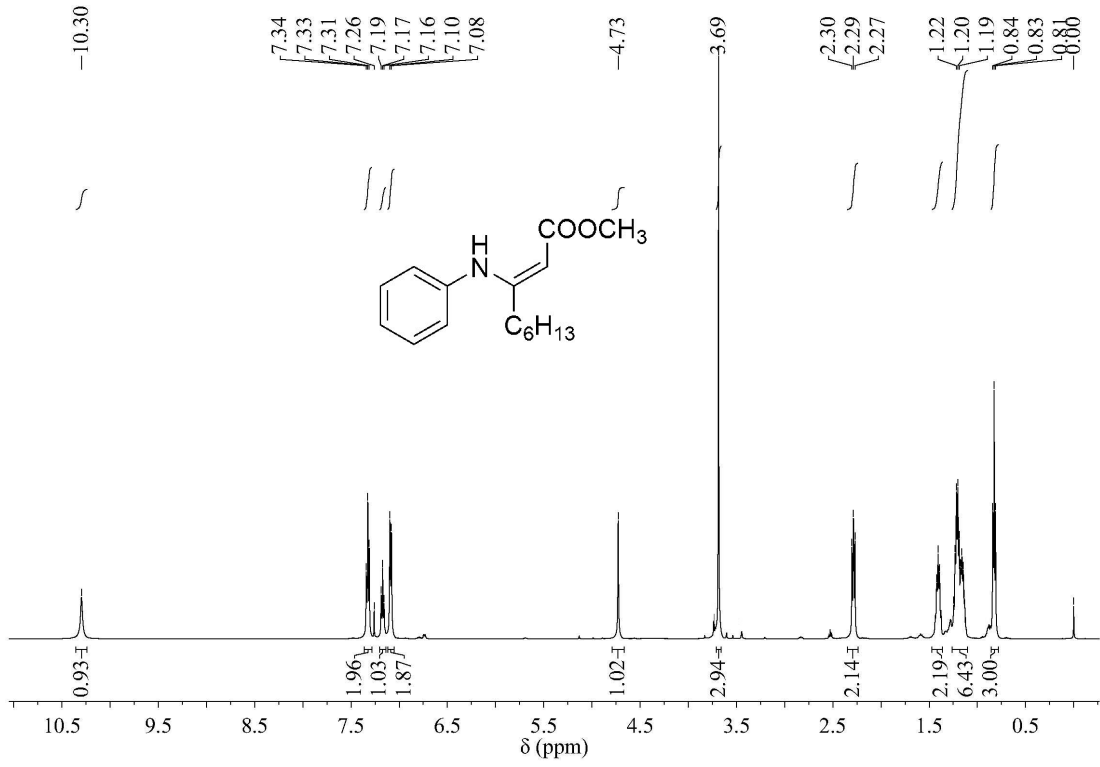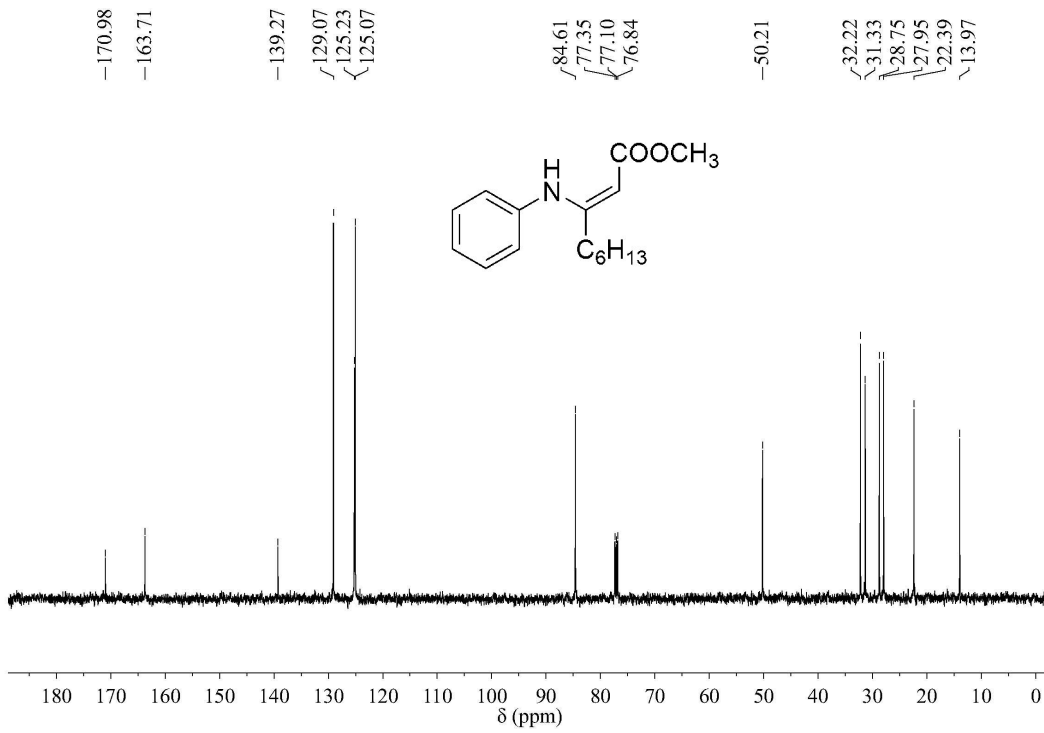



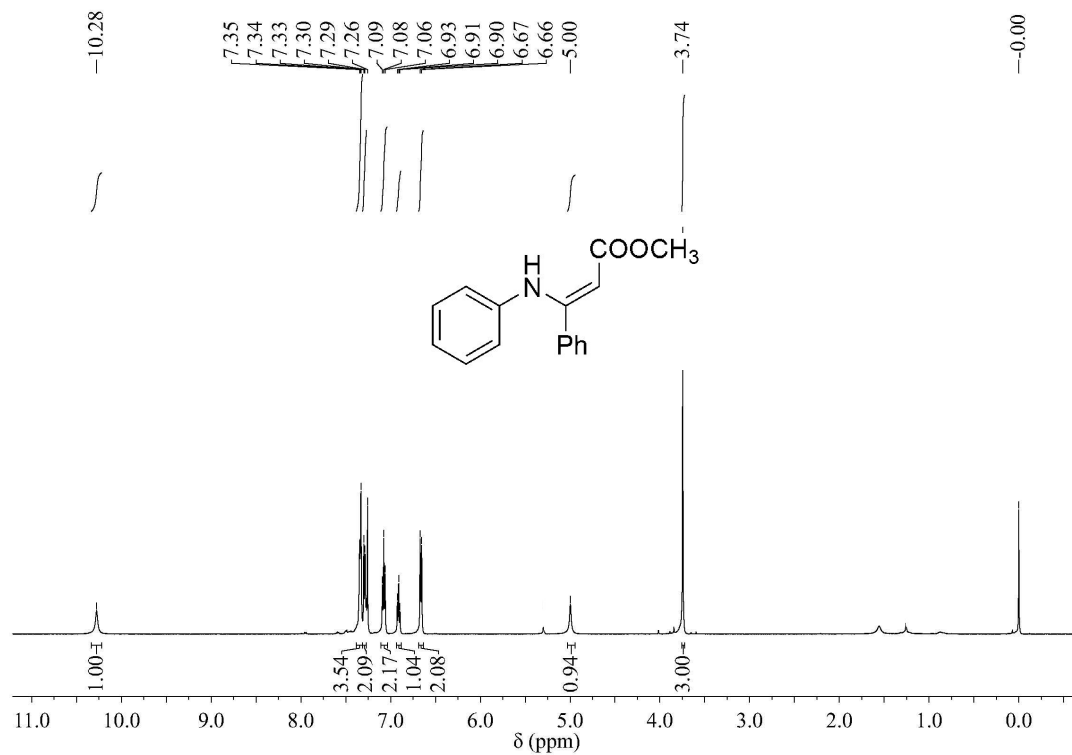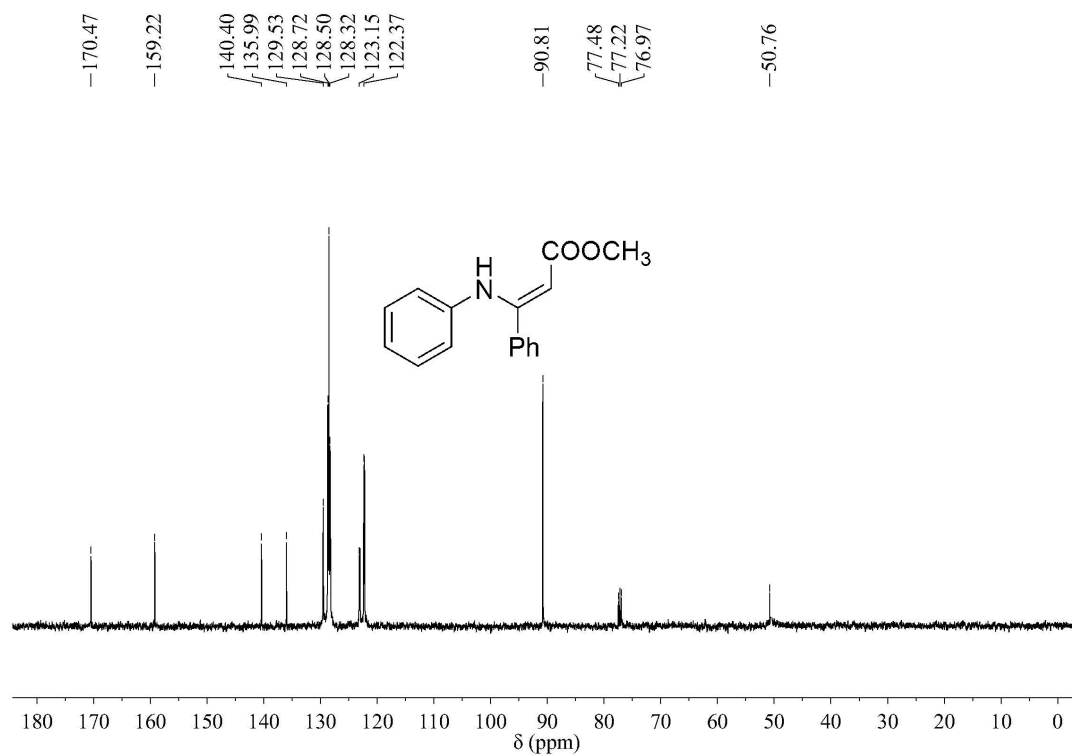

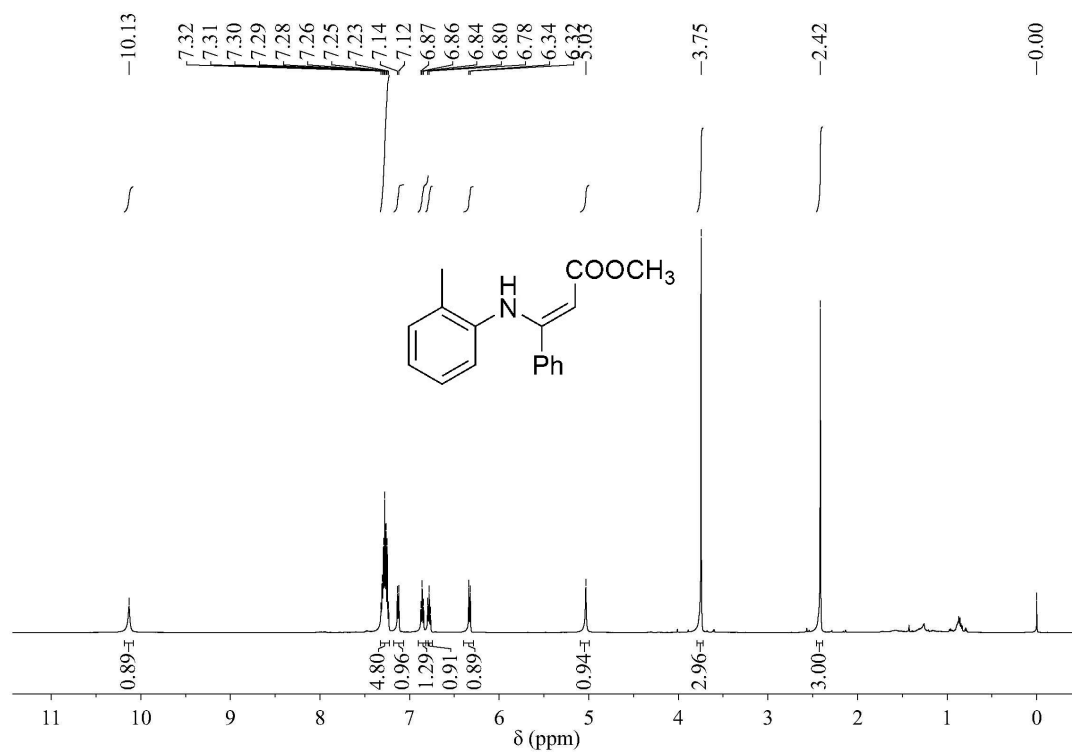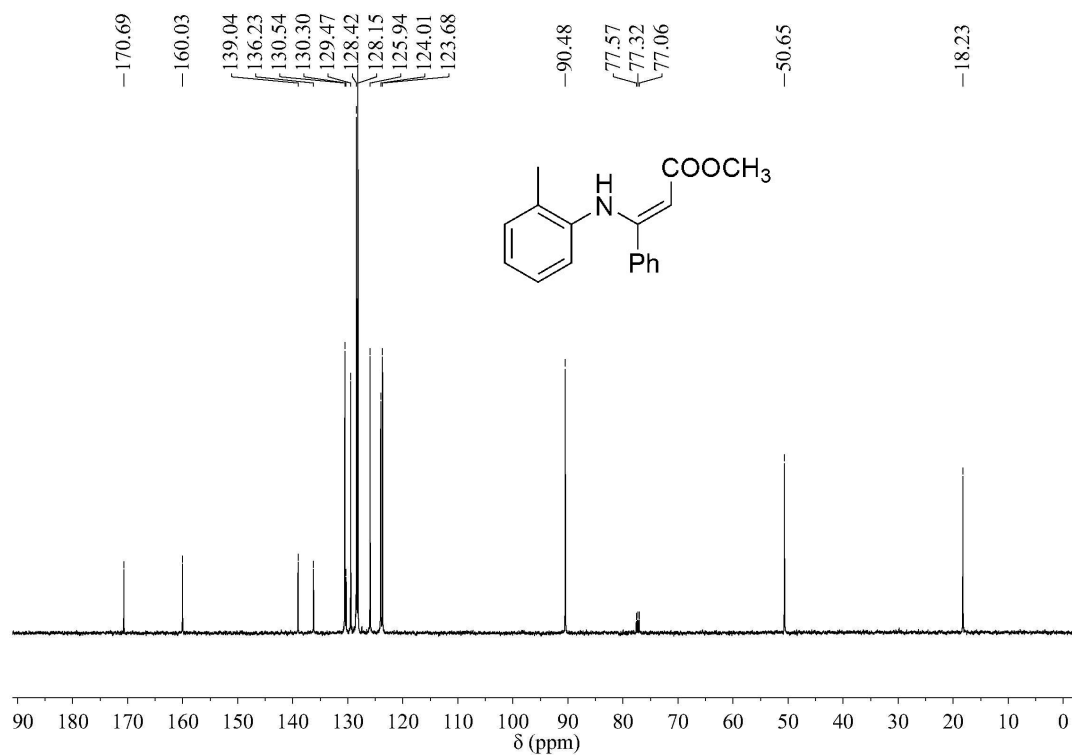

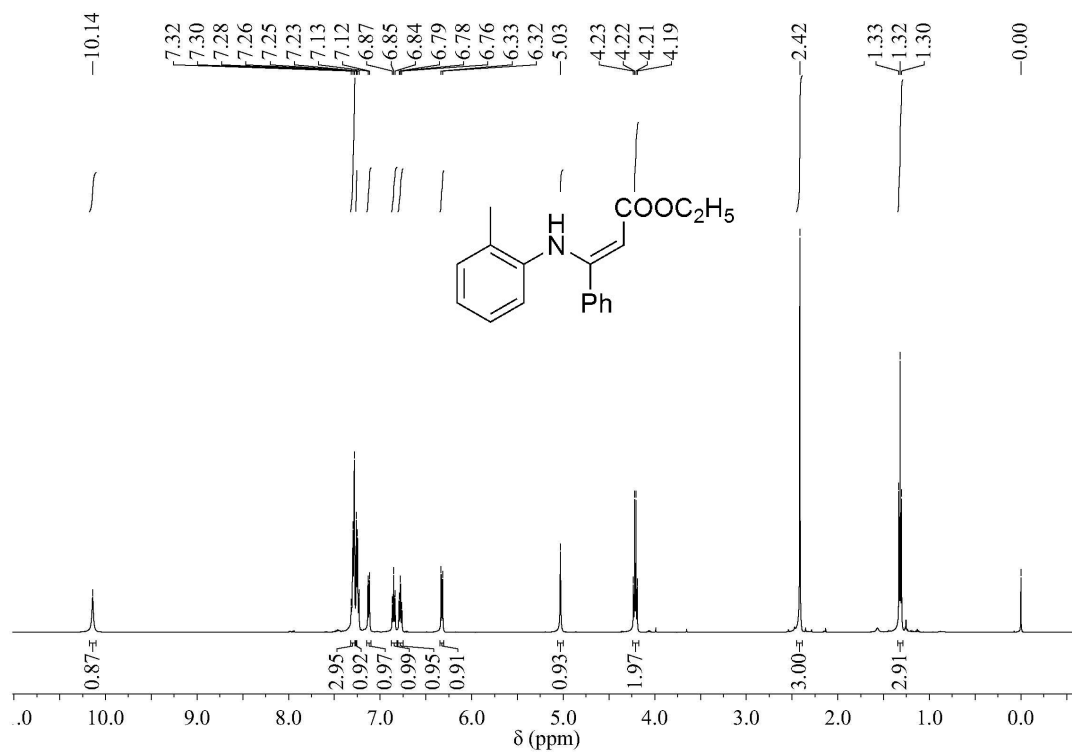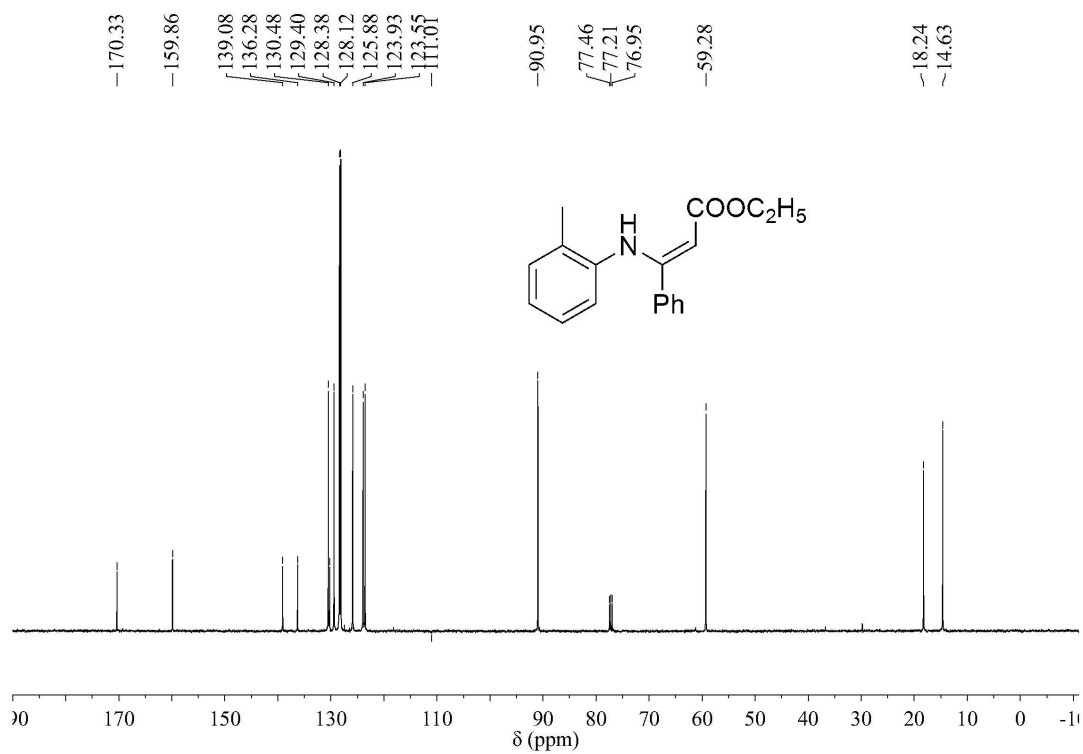

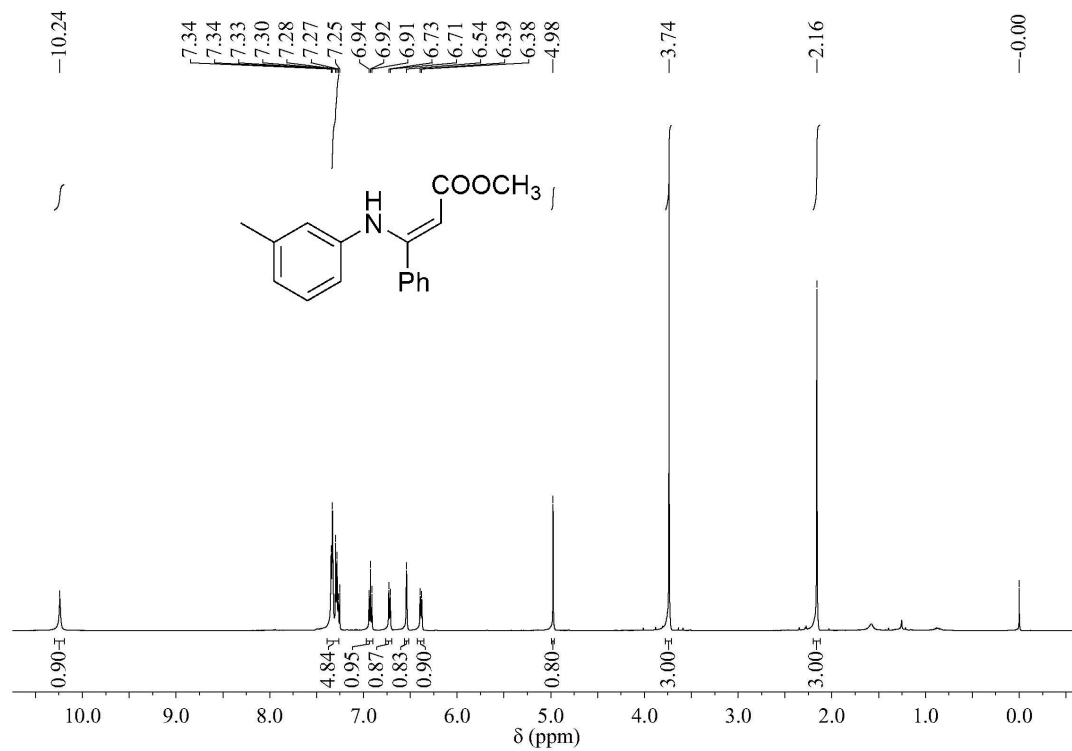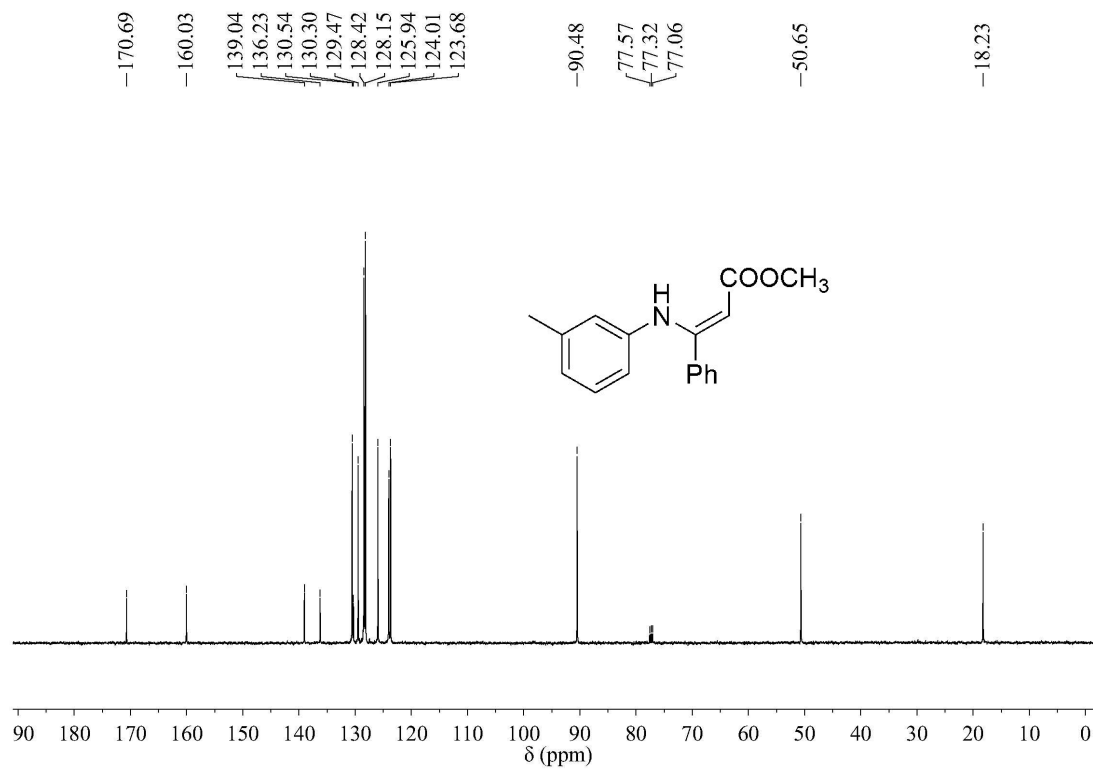

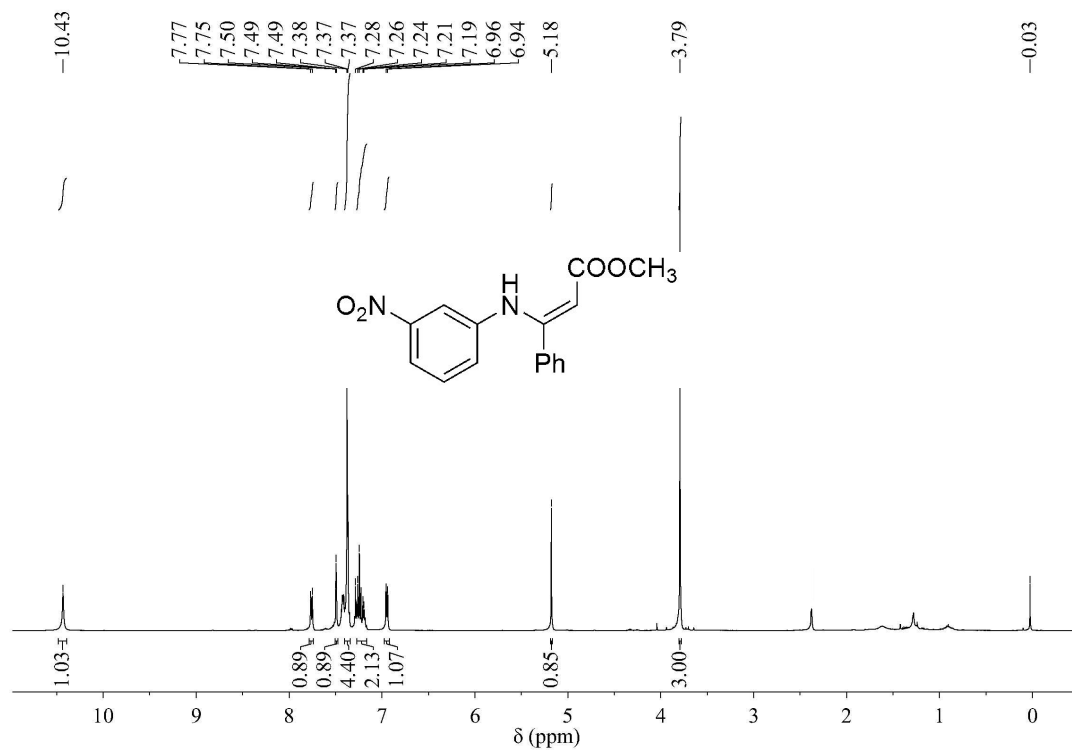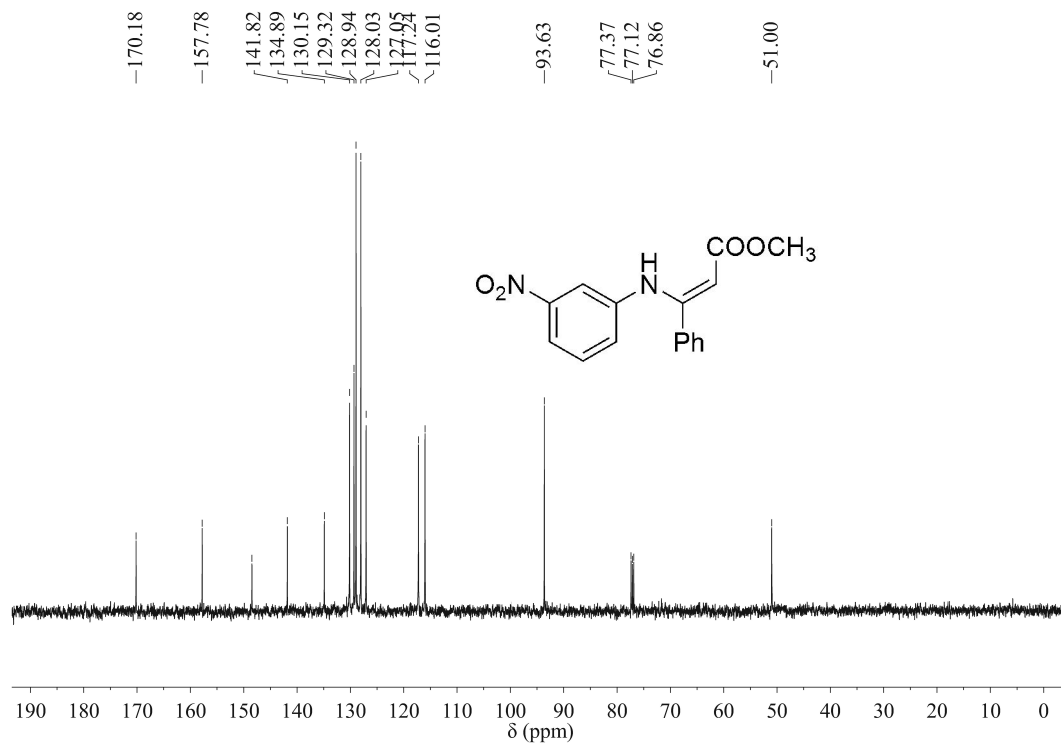

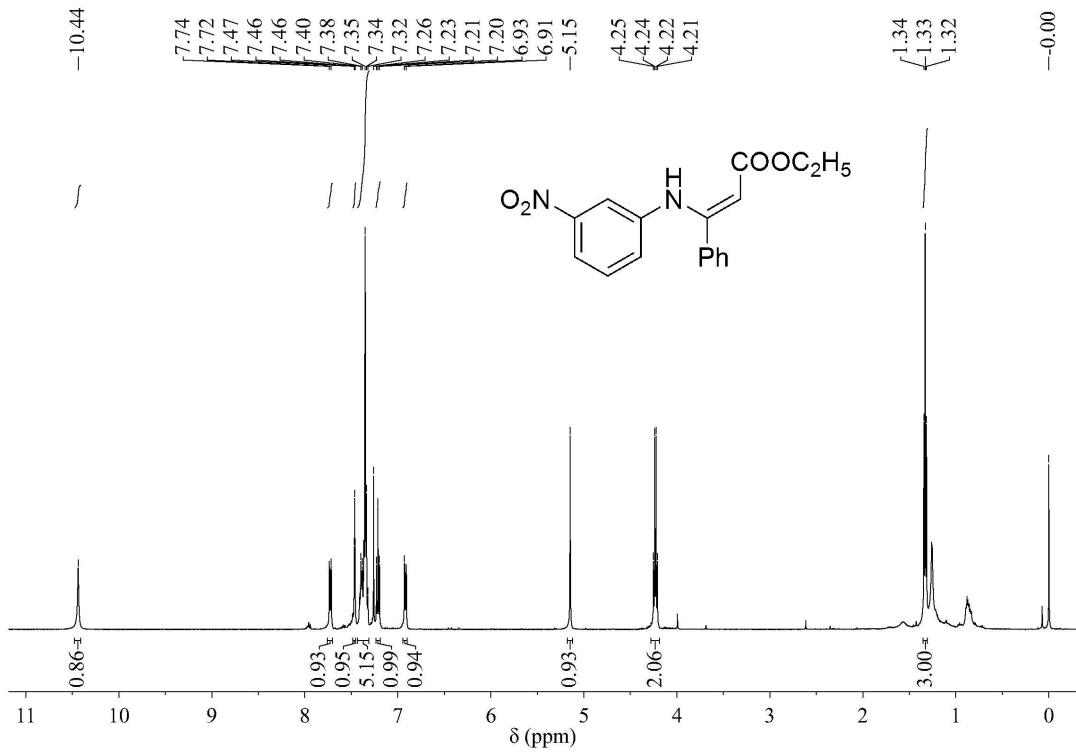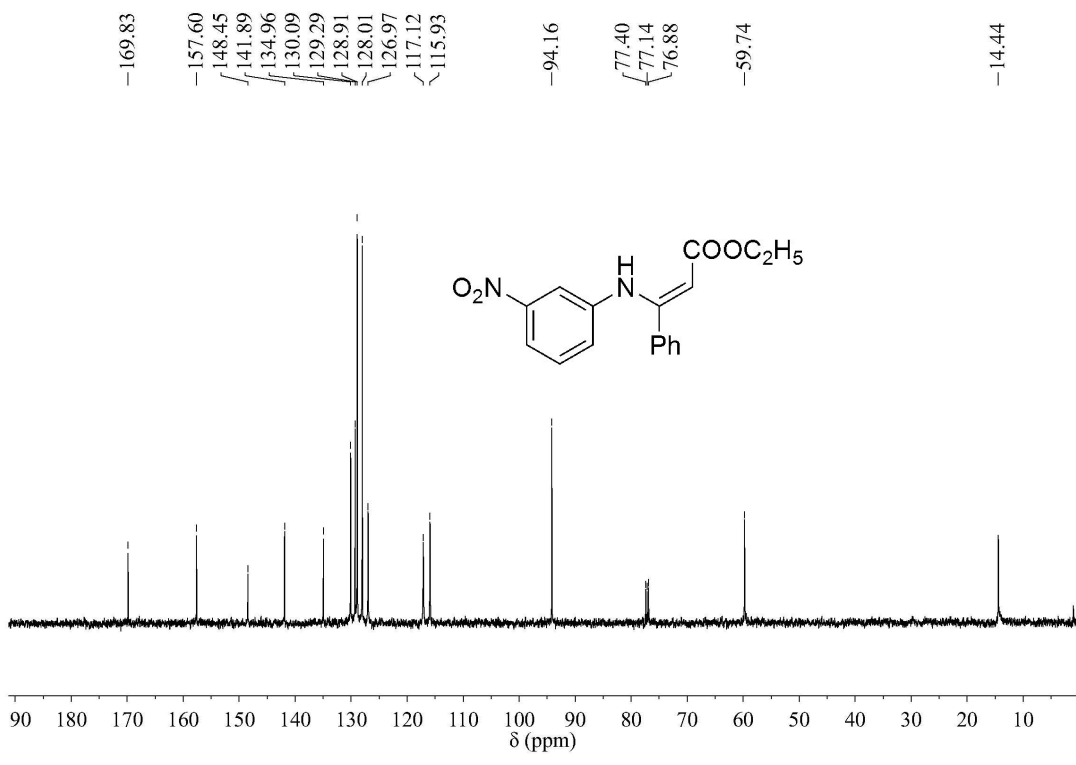

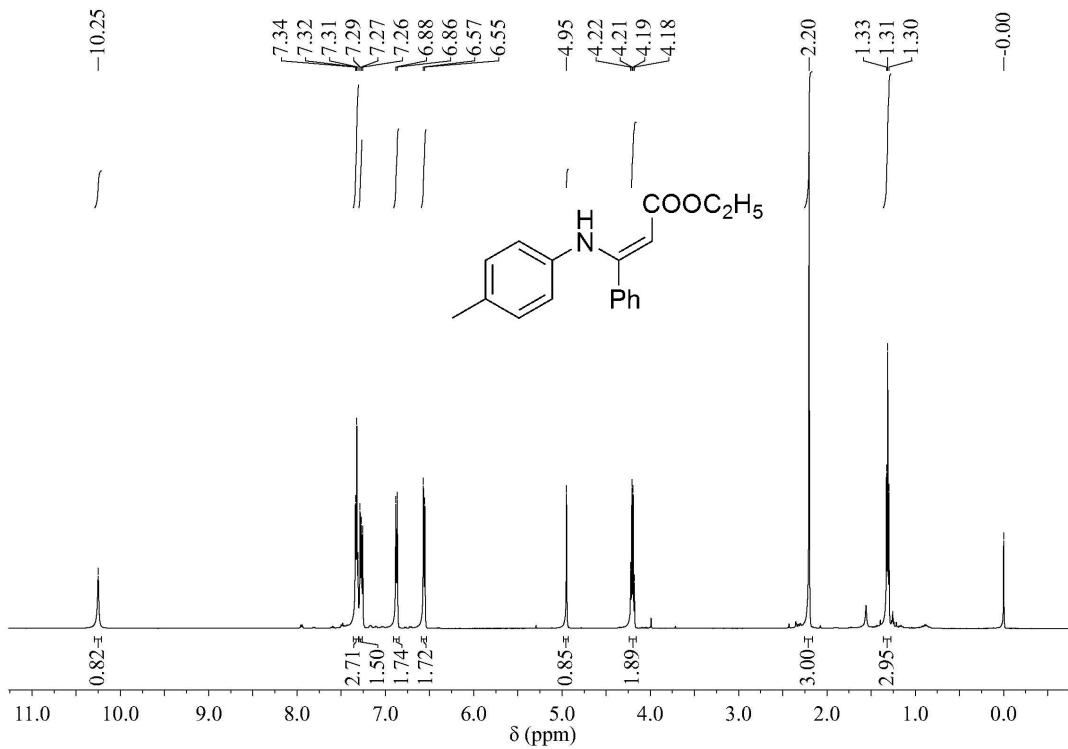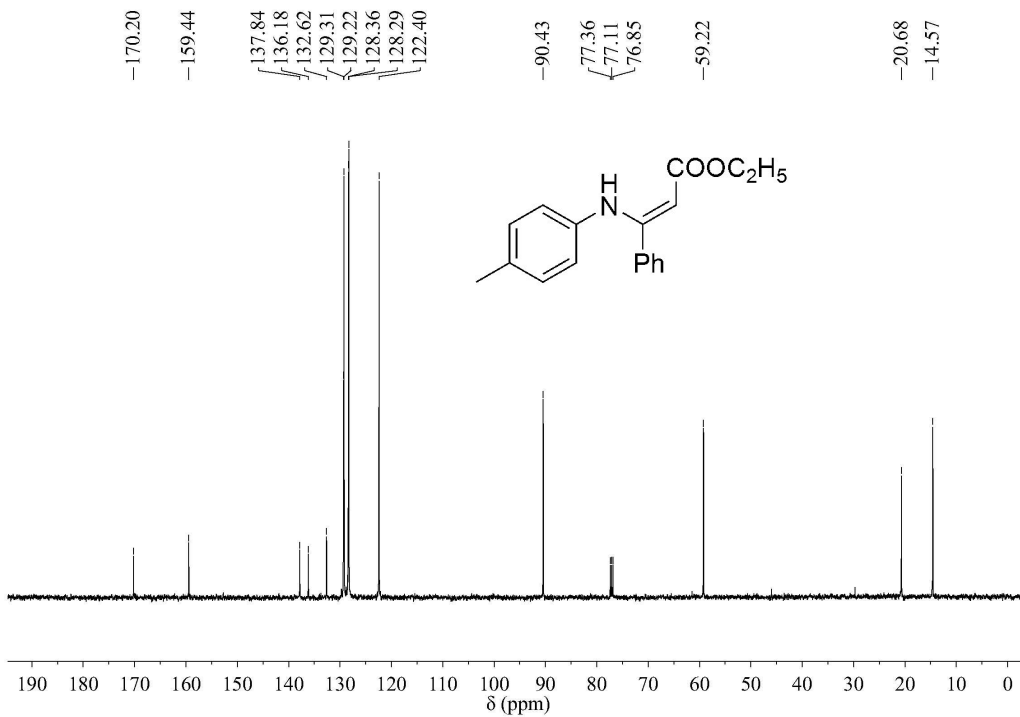

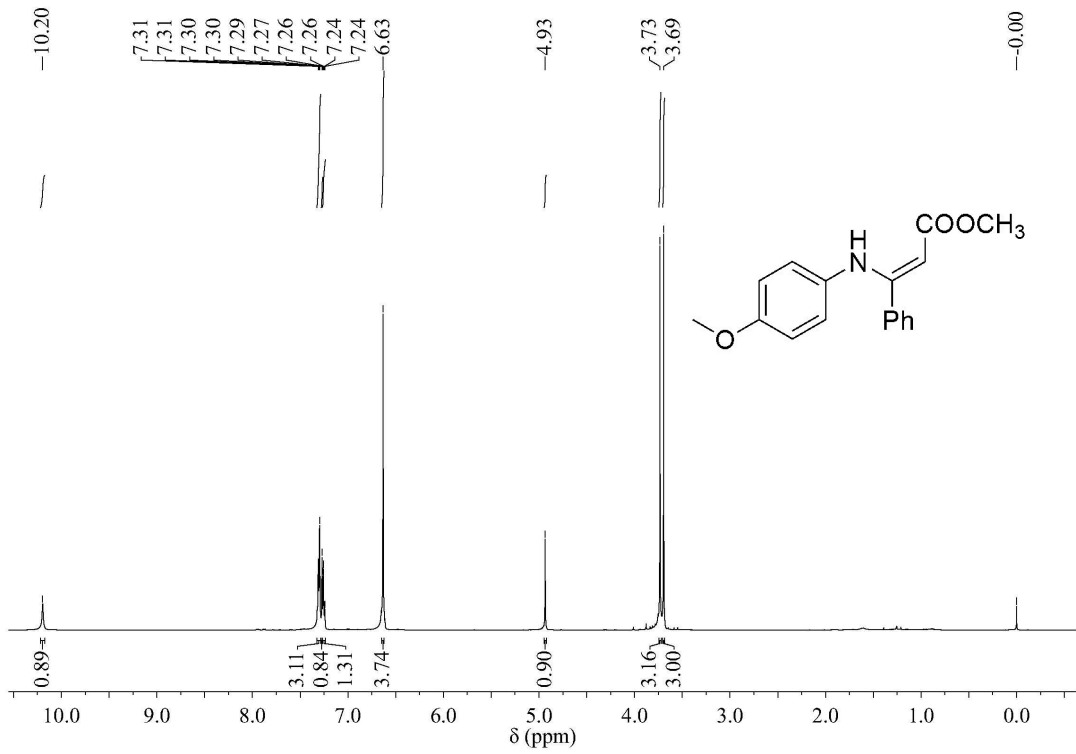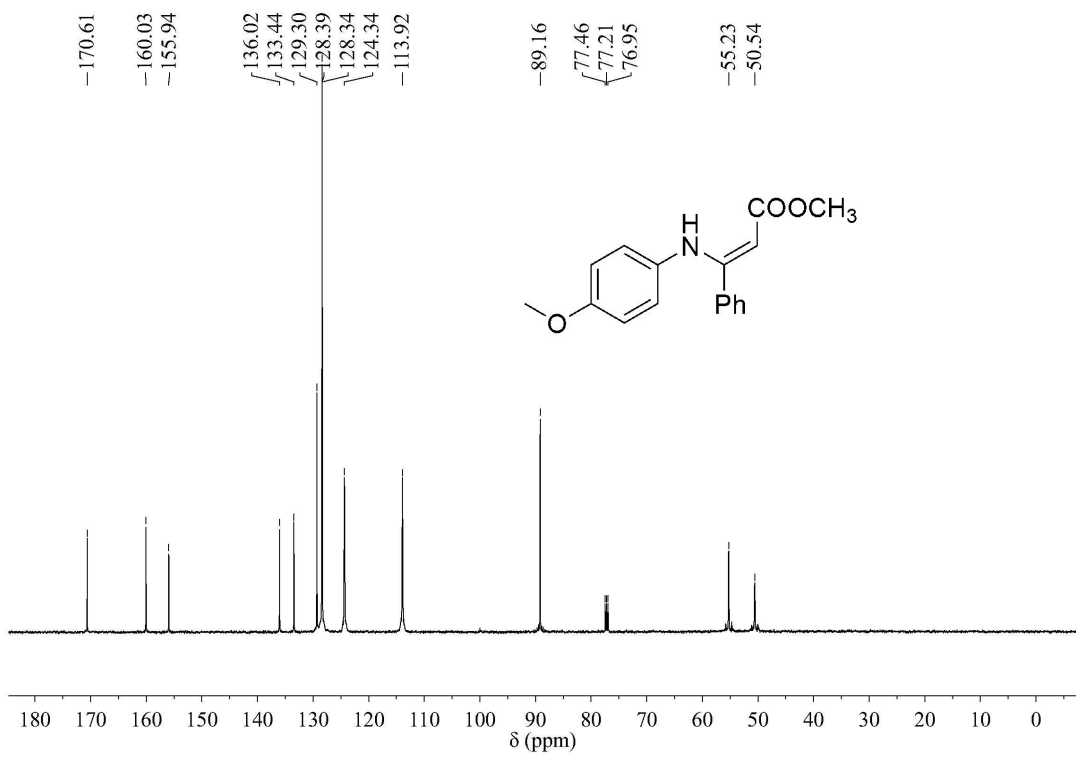



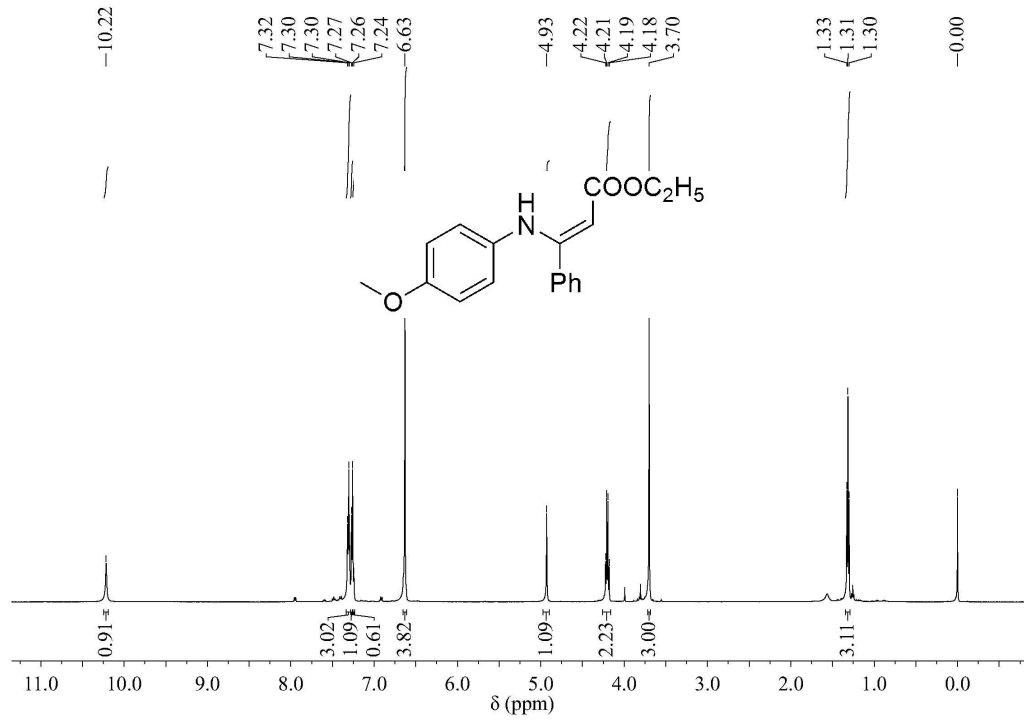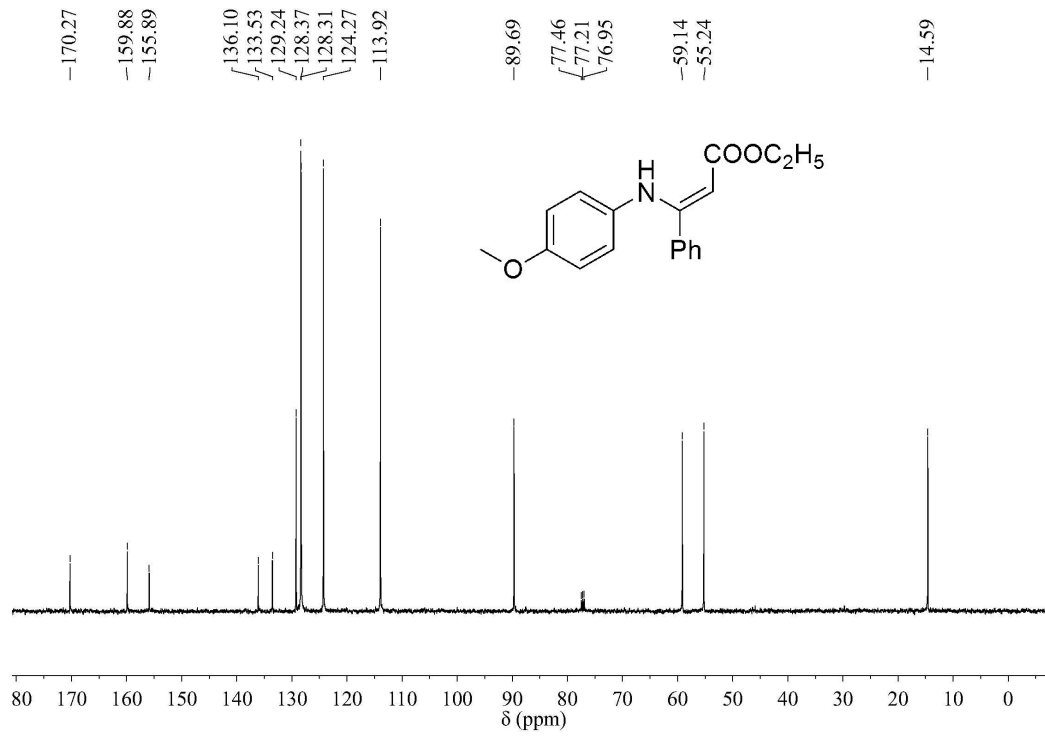

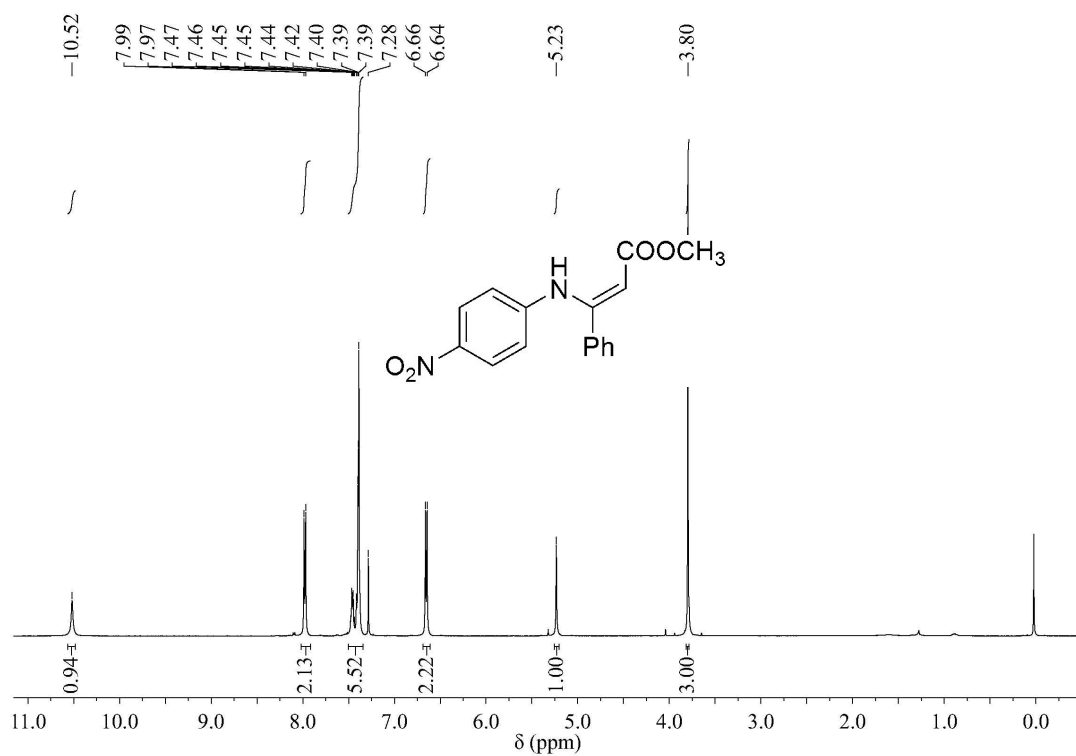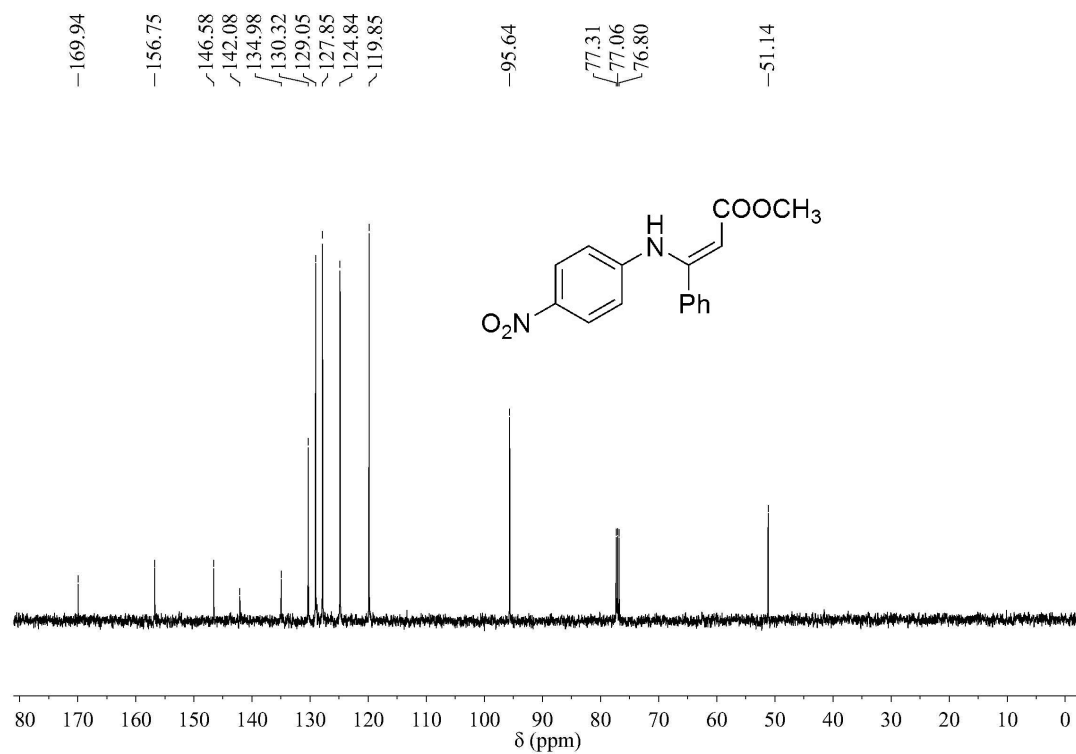

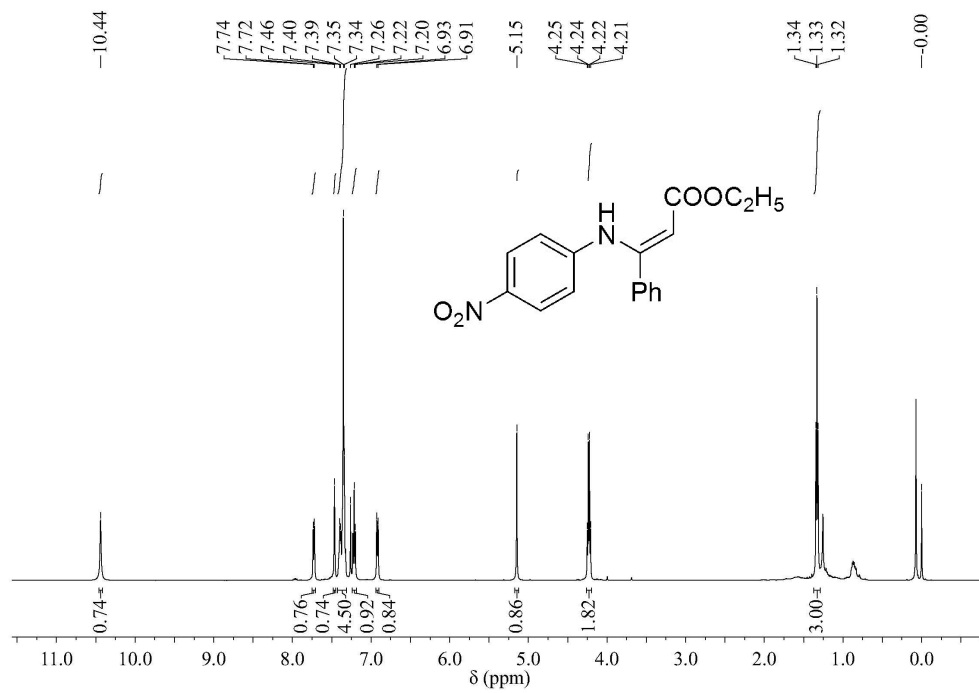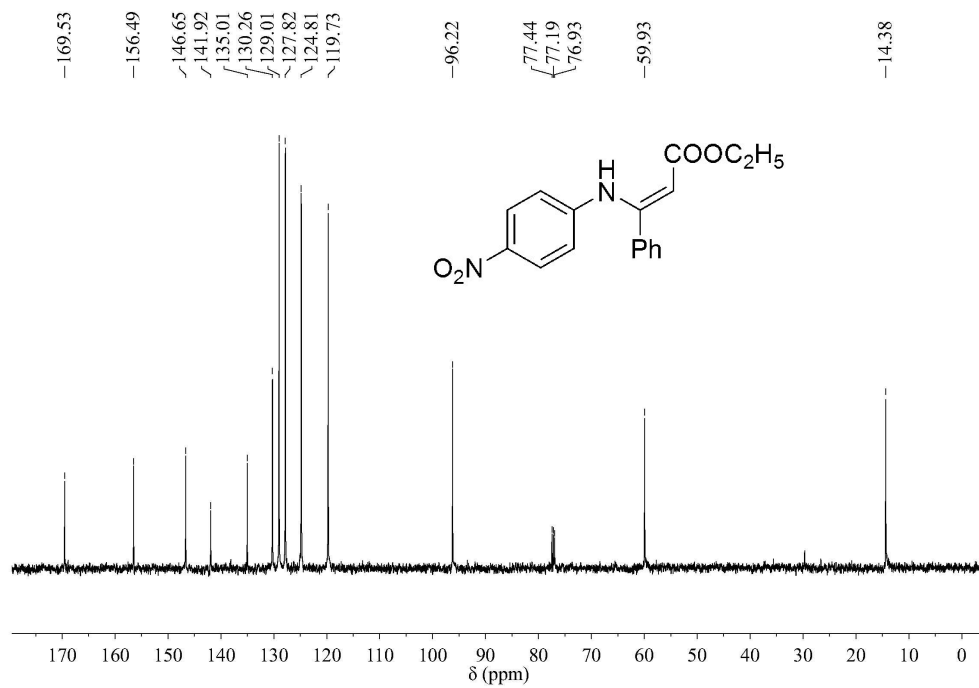

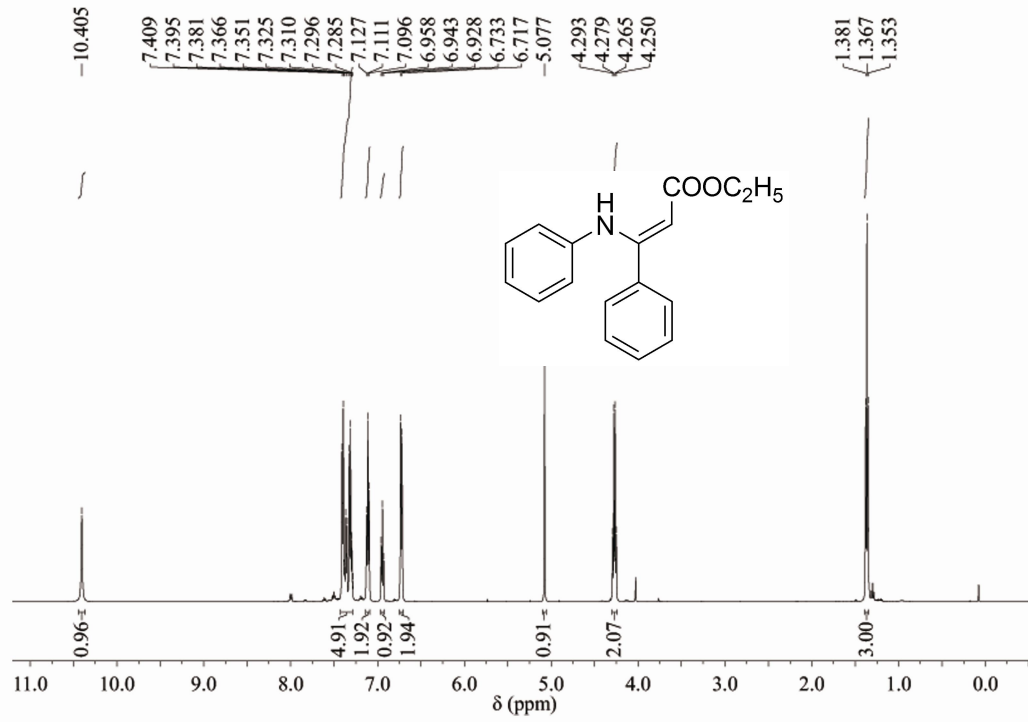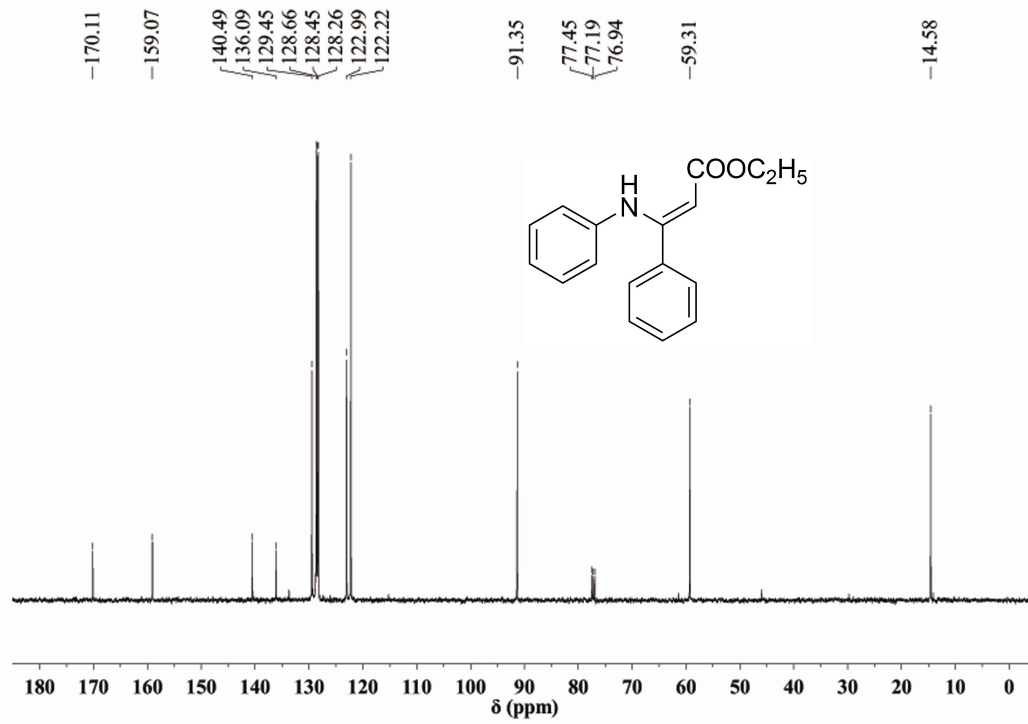

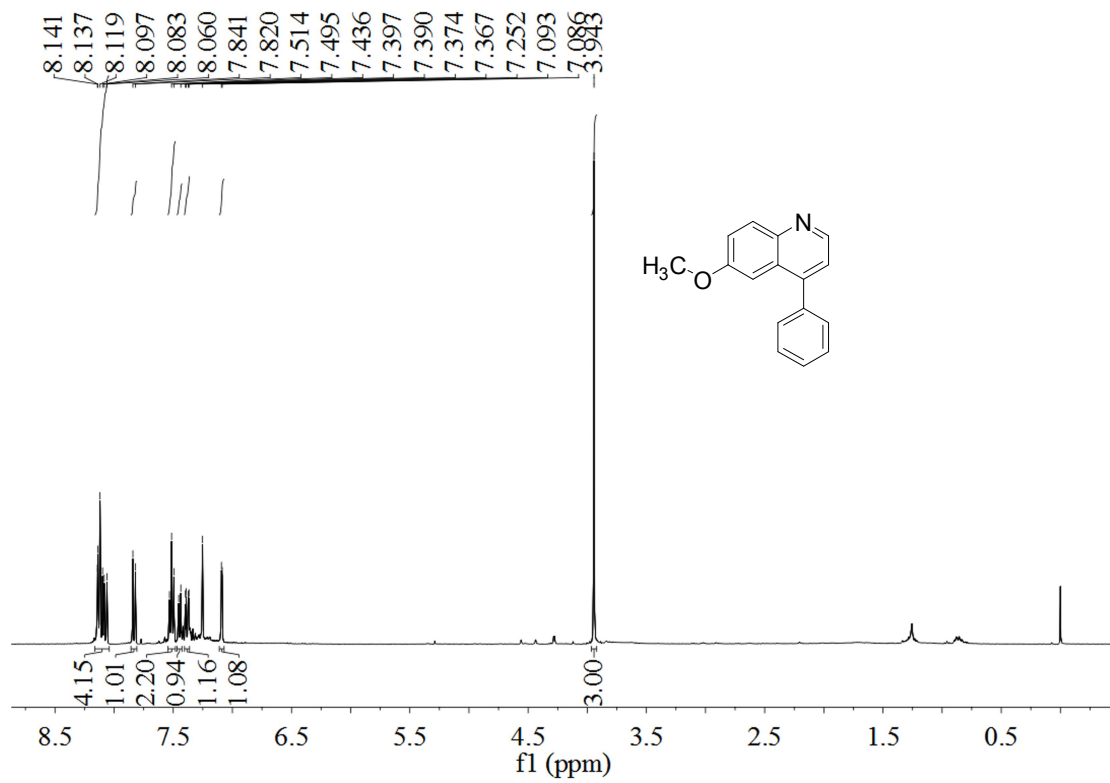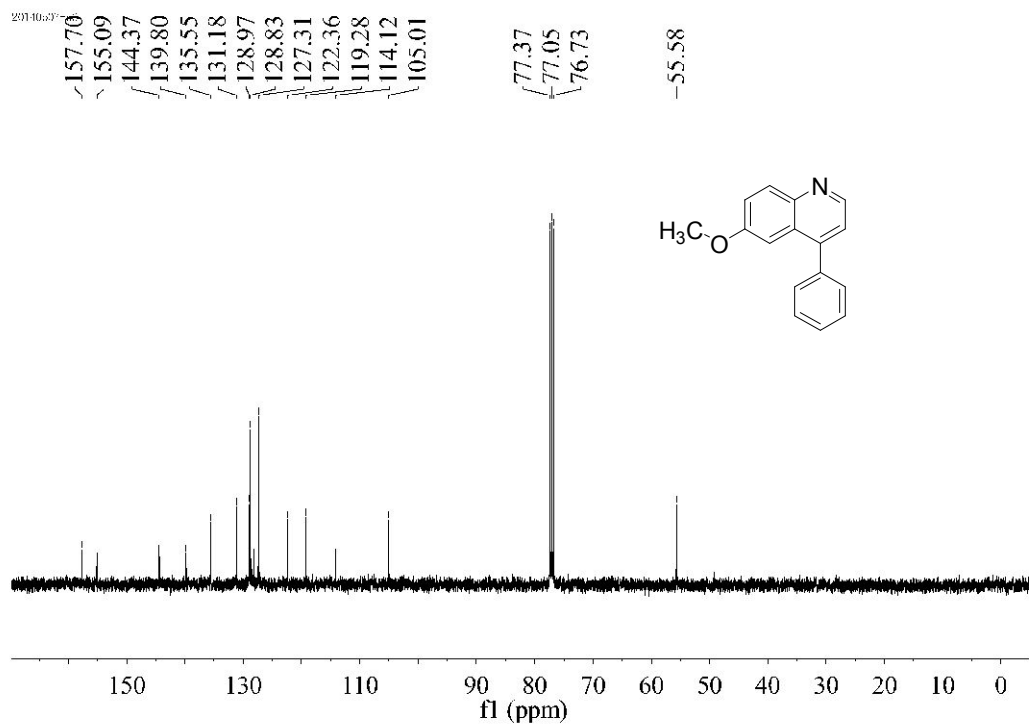

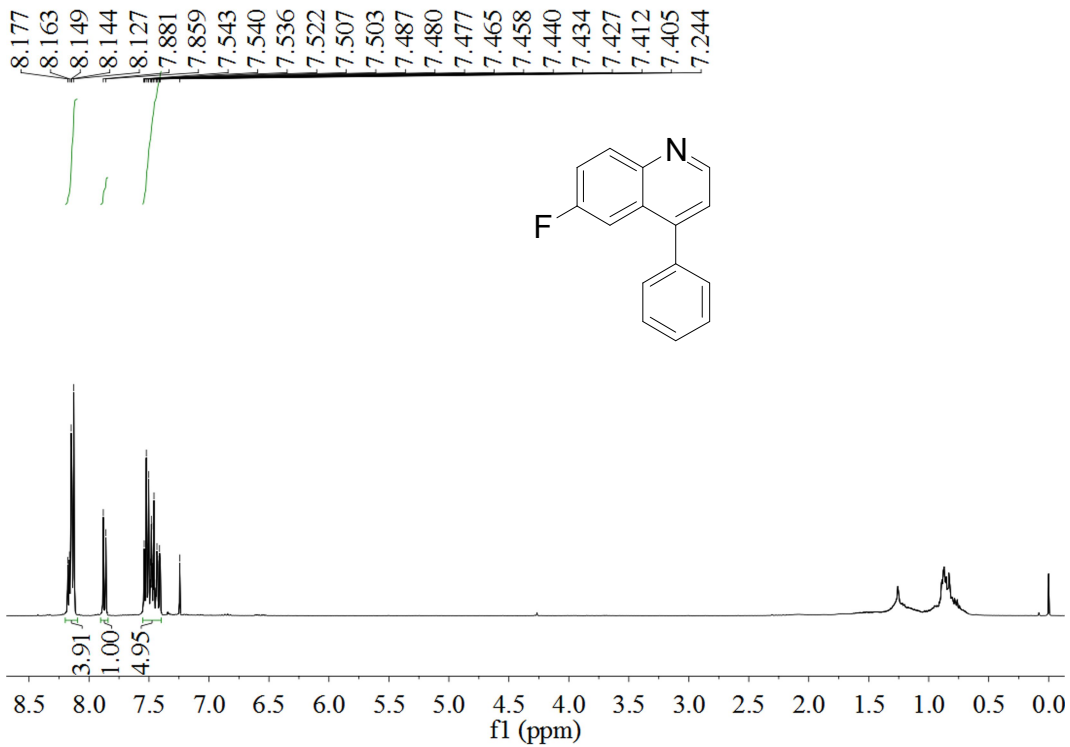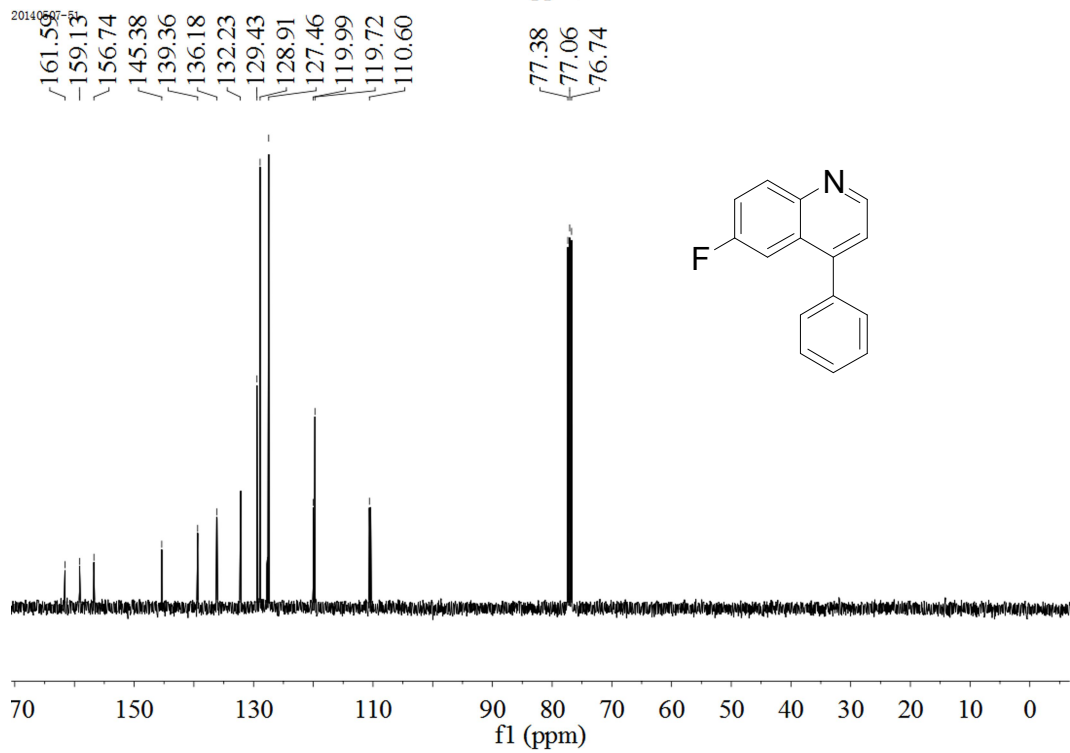

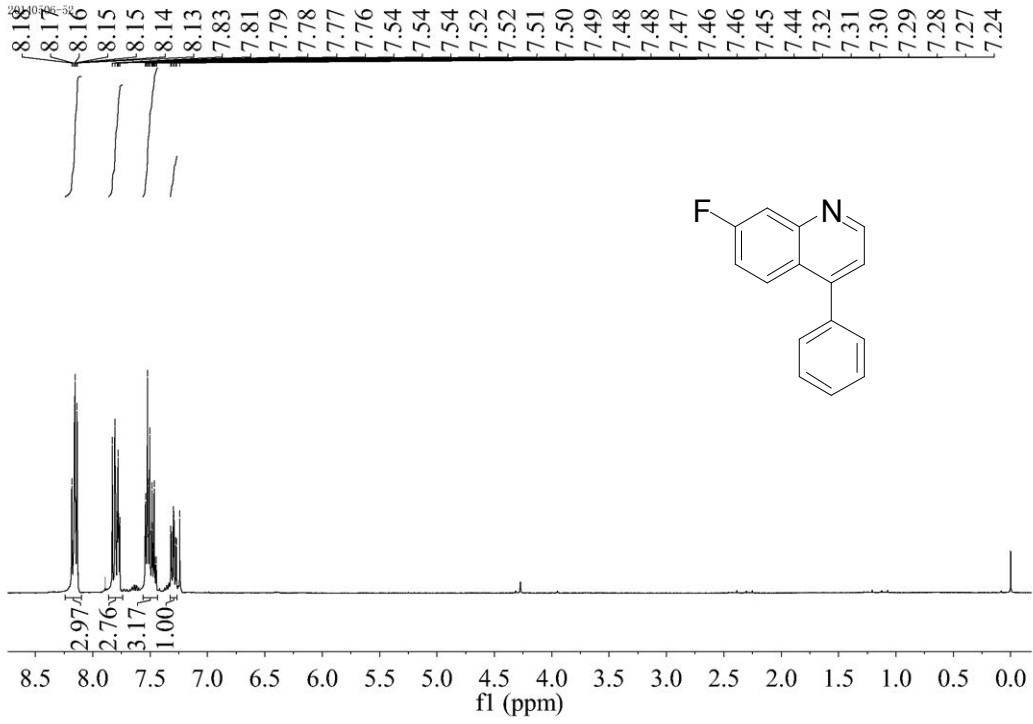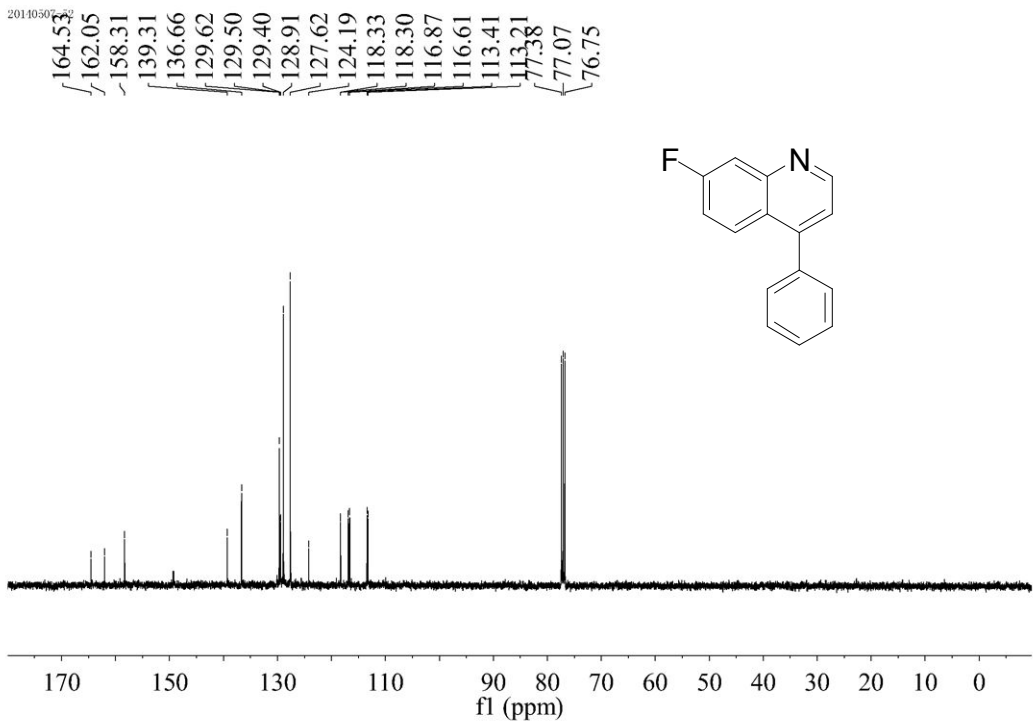

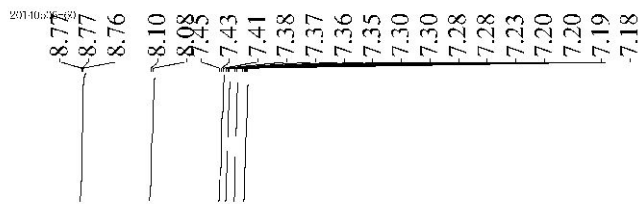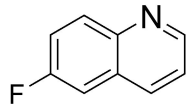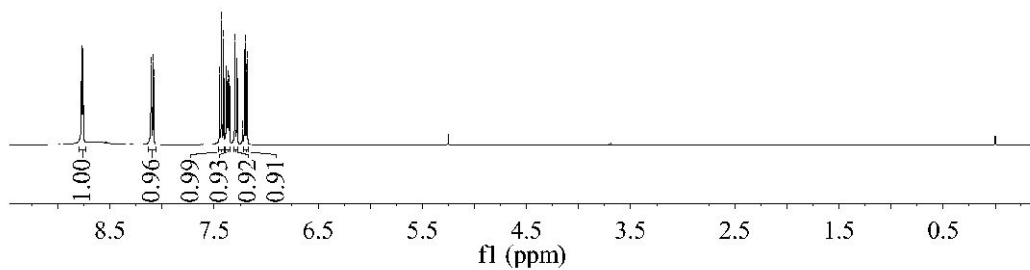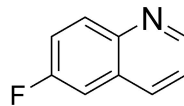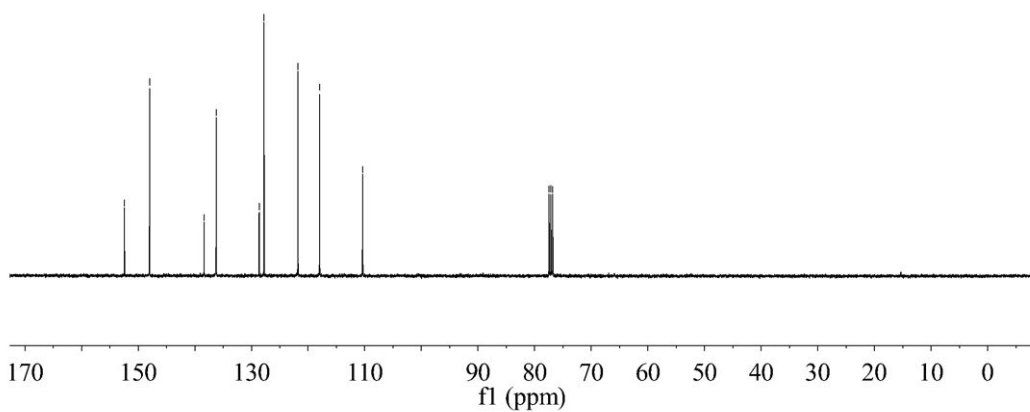



9.062  
9.058  
9.051  
9.048  
8.240  
8.236  
8.219  
8.217  
8.216  
8.213  
8.206  
8.184  
7.870  
7.865  
7.844  
7.557  
7.546  
7.526

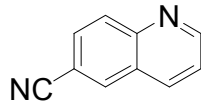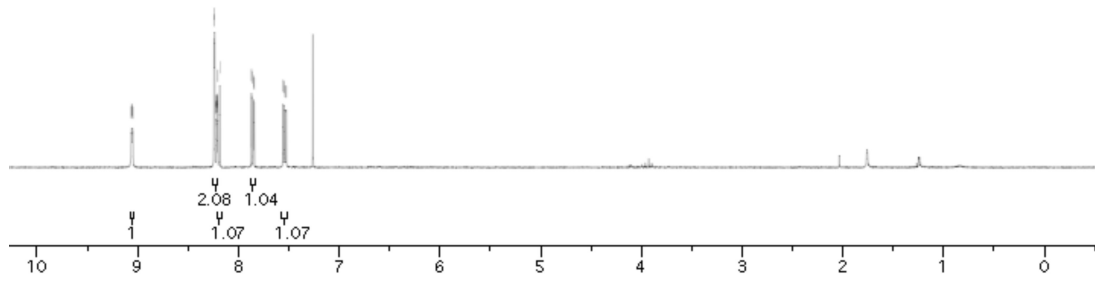

153.4  
149.3  
136.5  
134.2  
131.2  
130.3  
127.7  
122.9  
118.6  
110.5

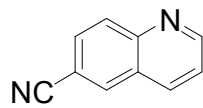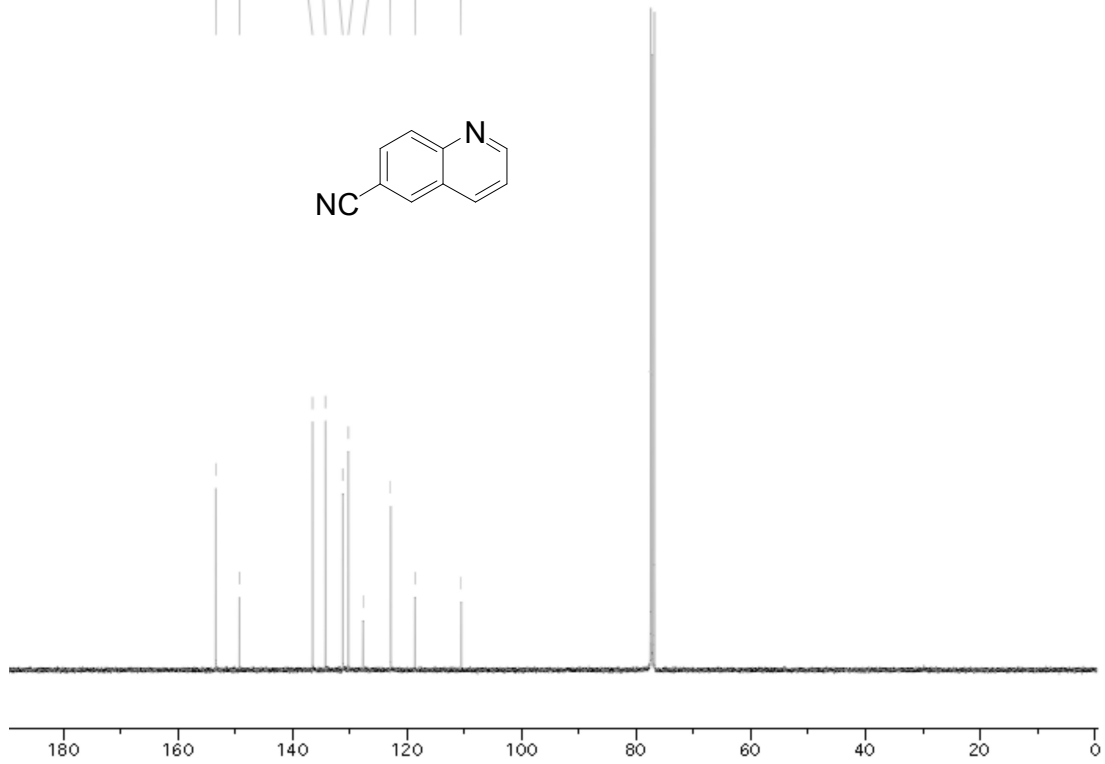

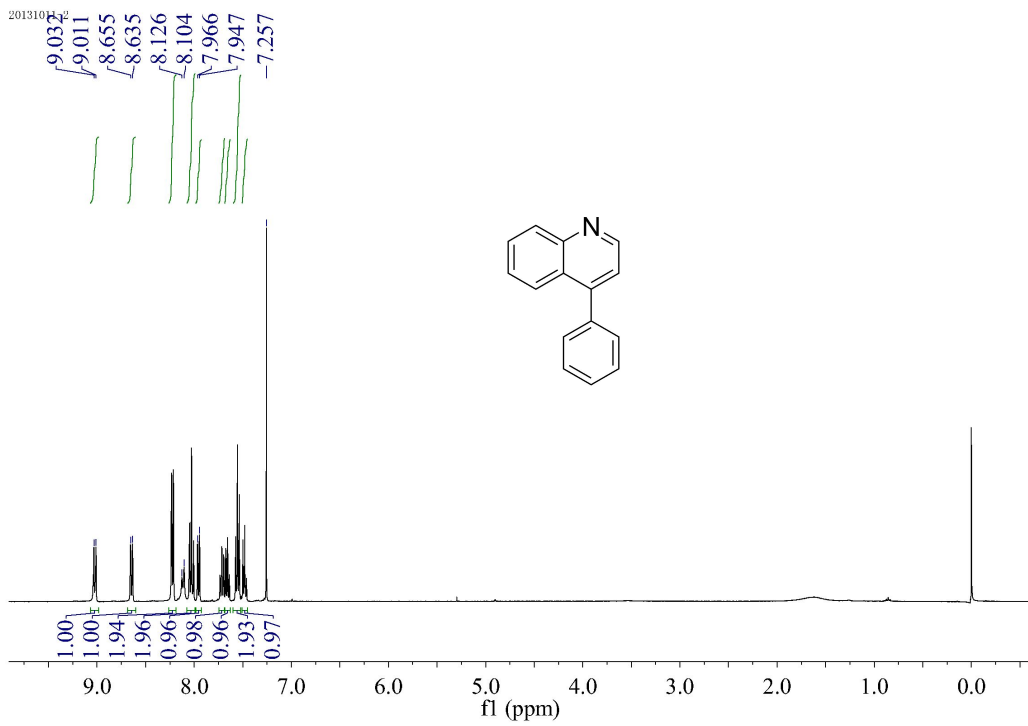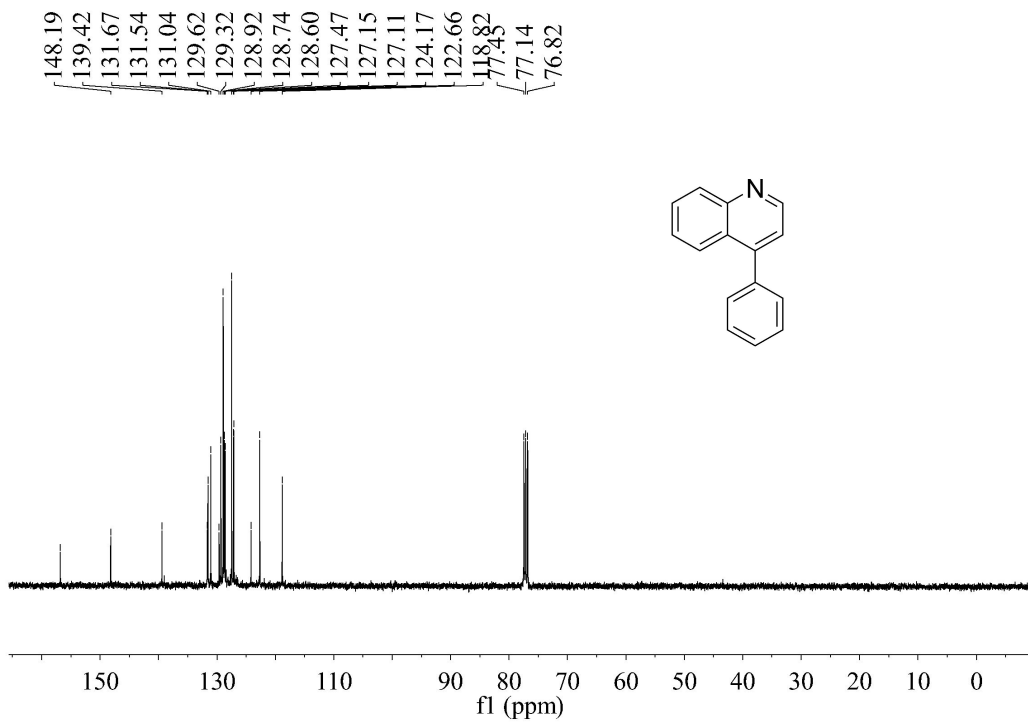

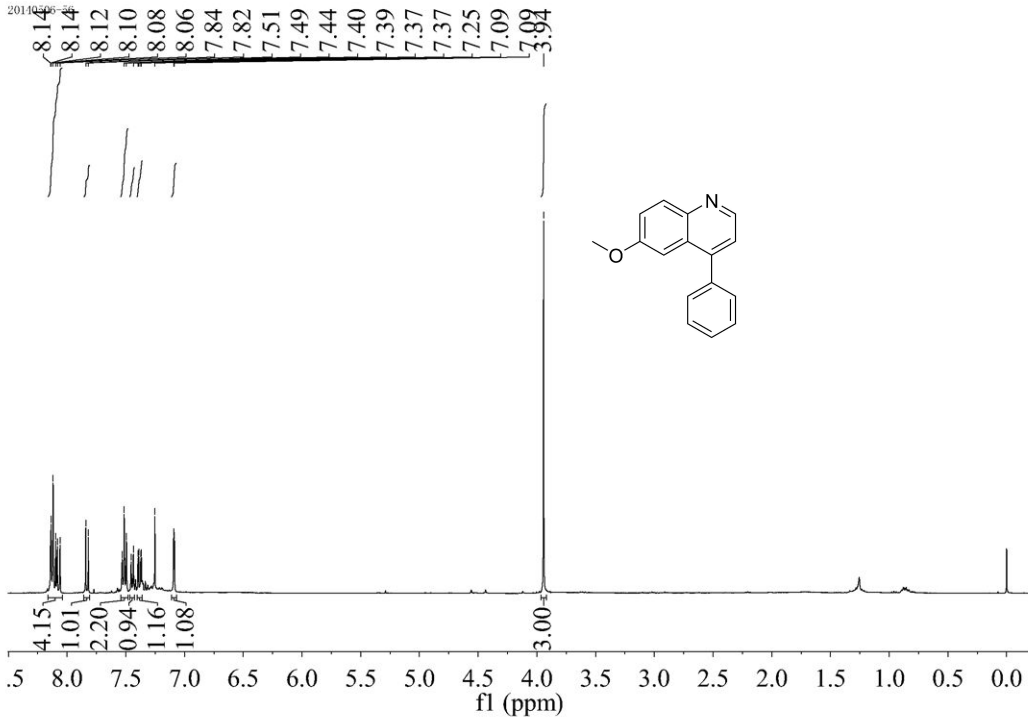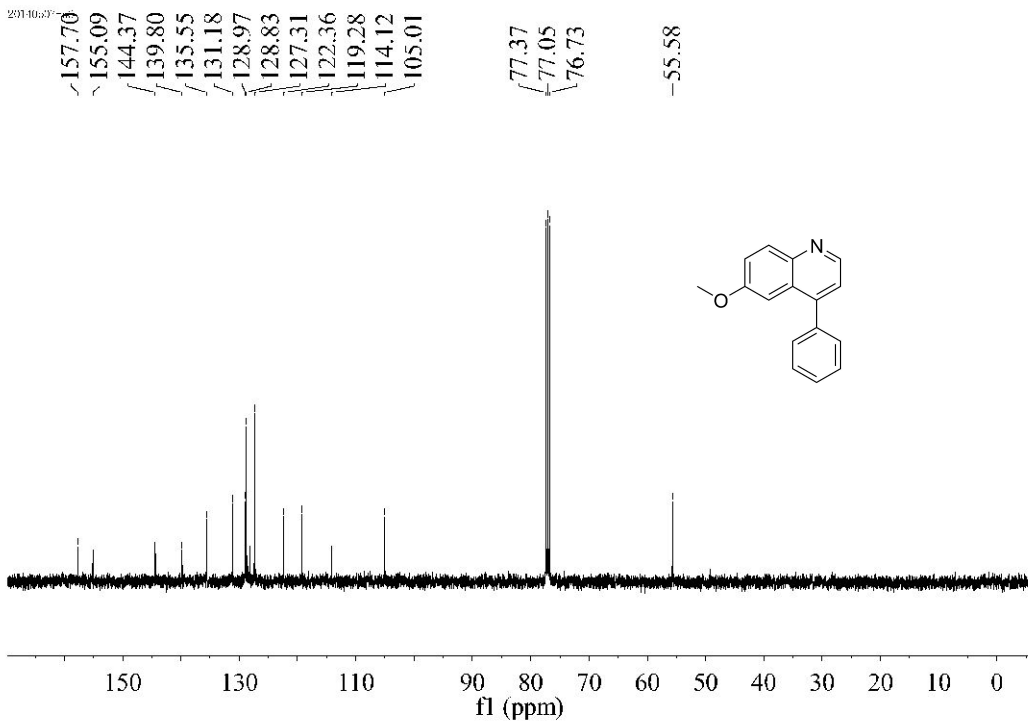

Supplement: c5ra05209b1.pdf [file c5ra05209b1.pdf]
